# Supplementary material for: Tandem one-pot synthesis of 2-arylcinnolin-6-one derivatives from arylhydrazonopropanals and acetoacetanilides using sustainable ultrasound and microwave platforms
Source: Royal Society of Chemistry journal article supplement (doi:10.1039/c8ra06494f), 2018-01-01
Supplement: c8ra06494f1.pdf [file c8ra06494f1.pdf]

## Supplementary Material

# Tandem one-pot synthesis of 2-arylcinnolin-6-one derivatives from arylhydrazonopropanals and acetoacetanilides using sustainable ultrasound and microwave platforms

Hamad M. Al-Matar,<sup>a\*</sup> Kamal M. Dawood,<sup>b\*</sup> Wael M. Tohamy<sup>c</sup>

<sup>a</sup>Chemistry Department, Faculty of Science, University of Kuwait, P.O. Box 5969, Safat 13060, Kuwait.

<sup>b</sup>Chemistry Department, Faculty of Science, Cairo University, Giza 12613, Egypt.

<sup>c</sup>Organometallic and Organometalloid Chemistry Department, National Research Centre, Cairo, Egypt.

\*Corresponding author 1: Tel.: +965 24987559; fax: +965 24816482  
E-mail address: h.almatar@ku.edu.kw (H.M. Al-Matar)

\*Corresponding author 2: Tel.: +2 0235676602; fax: +2 0235727556  
E-mail address: dr\_dawood@yahoo.com (K.M. Dawood)

### Table of Contents:

|     |                                                    |     |
|-----|----------------------------------------------------|-----|
| 1.  | <sup>1</sup> H NMR spectrum of compound <b>3a</b>  | S3  |
| 2.  | MALDI spectrum of compound <b>3a</b>               | S4  |
| 3.  | <sup>1</sup> H NMR spectrum of compound <b>3b</b>  | S5  |
| 4.  | <sup>13</sup> C NMR spectrum of compound <b>3b</b> | S6  |
| 5.  | MALDI spectrum of compound <b>3b</b>               | S7  |
| 6.  | <sup>1</sup> H NMR spectrum of compound <b>3c</b>  | S8  |
| 7.  | <sup>13</sup> C NMR spectrum of compound <b>3c</b> | S9  |
| 8.  | MALDI spectrum of compound <b>3c</b>               | S10 |
| 9.  | <sup>1</sup> H NMR spectrum of compound <b>3d</b>  | S11 |
| 10. | <sup>13</sup> C NMR spectrum of compound <b>3d</b> | S12 |
| 11. | MALDI spectrum of compound <b>3d</b>               | S13 |
| 12. | <sup>1</sup> H NMR spectrum of compound <b>3e</b>  | S14 |
| 13. | <sup>13</sup> C NMR spectrum of compound <b>3e</b> | S15 |

|     |                                                    |     |
|-----|----------------------------------------------------|-----|
| 14. | <sup>1</sup> H NMR spectrum of compound <b>3f</b>  | S16 |
| 15. | <sup>13</sup> C NMR spectrum of compound <b>3f</b> | S17 |
| 16. | <sup>1</sup> H NMR spectrum of compound <b>3g</b>  | S18 |
| 17. | <sup>13</sup> C NMR spectrum of compound <b>3g</b> | S19 |
| 18. | MALDI spectrum of compound <b>3g</b>               | S20 |
| 19. | <sup>1</sup> H NMR spectrum of compound <b>3h</b>  | S21 |
| 20. | <sup>13</sup> C NMR spectrum of compound <b>3h</b> | S22 |
| 21. | <sup>1</sup> H NMR spectrum of compound <b>3i</b>  | S23 |
| 22. | <sup>13</sup> C NMR spectrum of compound <b>3i</b> | S24 |
| 23. | MALDI spectrum of compound <b>3i</b>               | S25 |
| 24. | <sup>1</sup> H NMR spectrum of compound <b>3j</b>  | S26 |
| 25. | <sup>13</sup> C NMR spectrum of compound <b>3j</b> | S27 |
| 26. | <sup>1</sup> H NMR spectrum of compound <b>3k</b>  | S28 |
| 27. | <sup>13</sup> C NMR spectrum of compound <b>3k</b> | S29 |
| 28. | MALDI spectrum of compound <b>3k</b>               | S30 |
| 29. | <sup>1</sup> H NMR spectrum of compound <b>3l</b>  | S31 |
| 30. | <sup>13</sup> C NMR spectrum of compound <b>3l</b> | S32 |
| 31. | <sup>1</sup> H NMR spectrum of compound <b>3m</b>  | S33 |
| 32. | <sup>13</sup> C NMR spectrum of compound <b>3m</b> | S34 |
| 33. | MALDI spectrum of compound <b>3m</b>               | S35 |
| 34. | <sup>1</sup> H NMR spectrum of compound <b>3n</b>  | S36 |
| 35. | <sup>13</sup> C NMR spectrum of compound <b>3n</b> | S37 |
| 36. | MALDI spectrum of compound <b>3n</b>               | S38 |
| 37. | <sup>1</sup> H NMR spectrum of compound <b>3o</b>  | S39 |
| 38. | <sup>13</sup> C NMR spectrum of compound <b>3o</b> | S40 |

**8-(4-Chlorophenyl)-3-methyl-6-oxo-*N*<sup>4</sup>,*N*<sup>5</sup>,2-triphenyl-2,6-dihydrocinnoline-4,5-dicarboxamide (3a)**

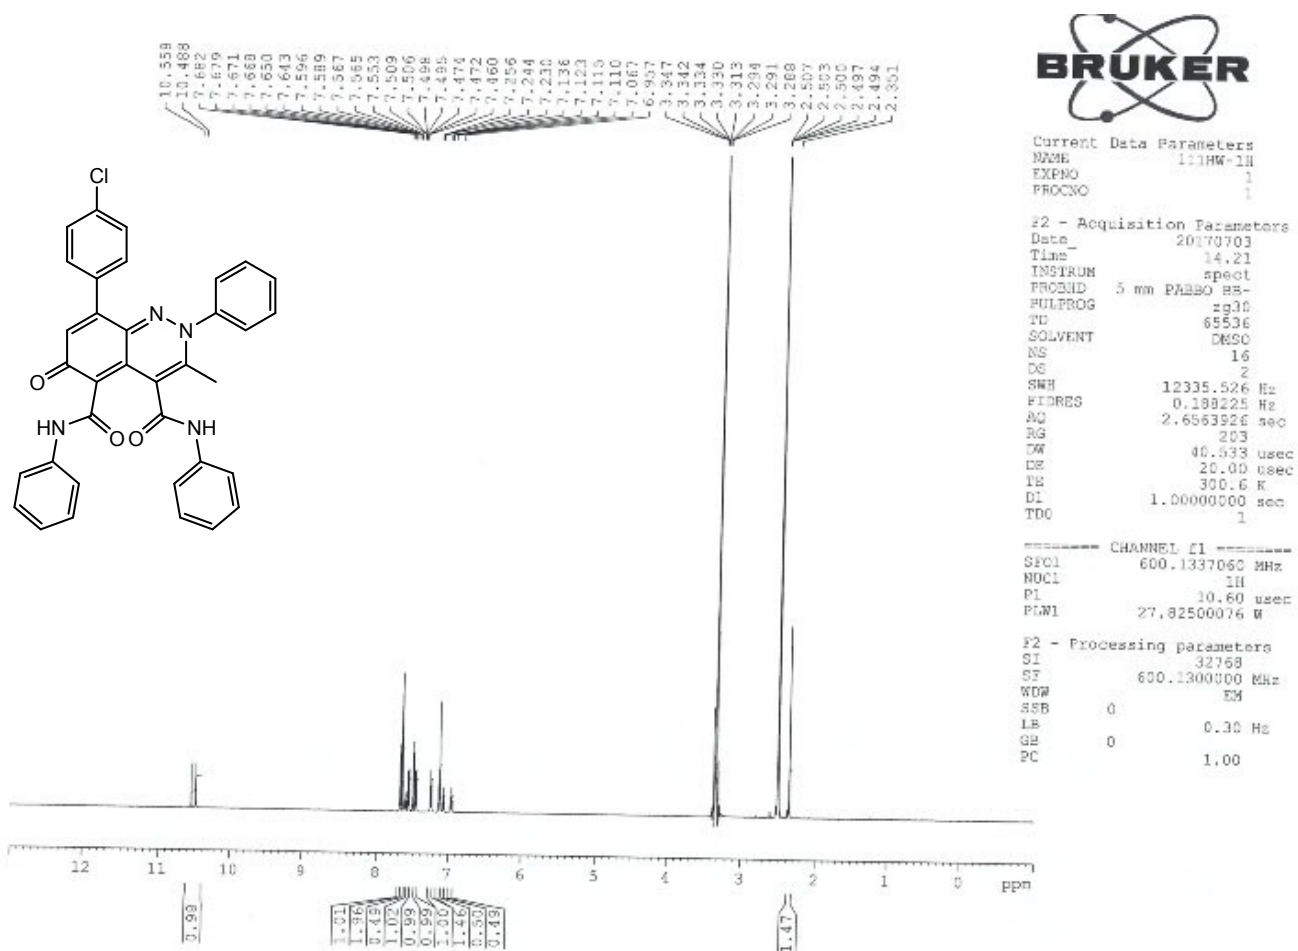

**8-(4-Chlorophenyl)-3-methyl-6-oxo-*N*<sup>4</sup>,*N*<sup>5</sup>,2-triphenyl-2,6-dihydrocinnoline-4,5-dicarboxamide (3a)**

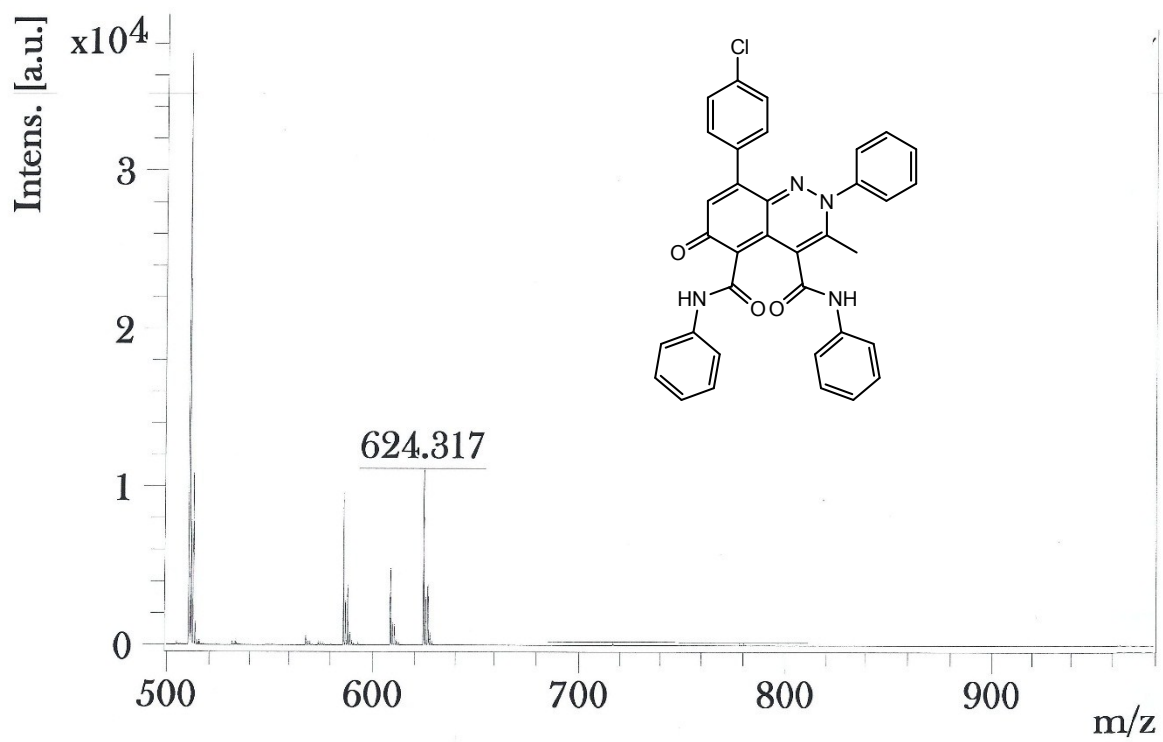

**2-(4-Chlorophenyl)-3-methyl-6-oxo-*N*<sup>4</sup>,*N*<sup>5</sup>,8-triphenyl-2,6-dihydrocinnoline-4,5-dicarboxamide (3b)**

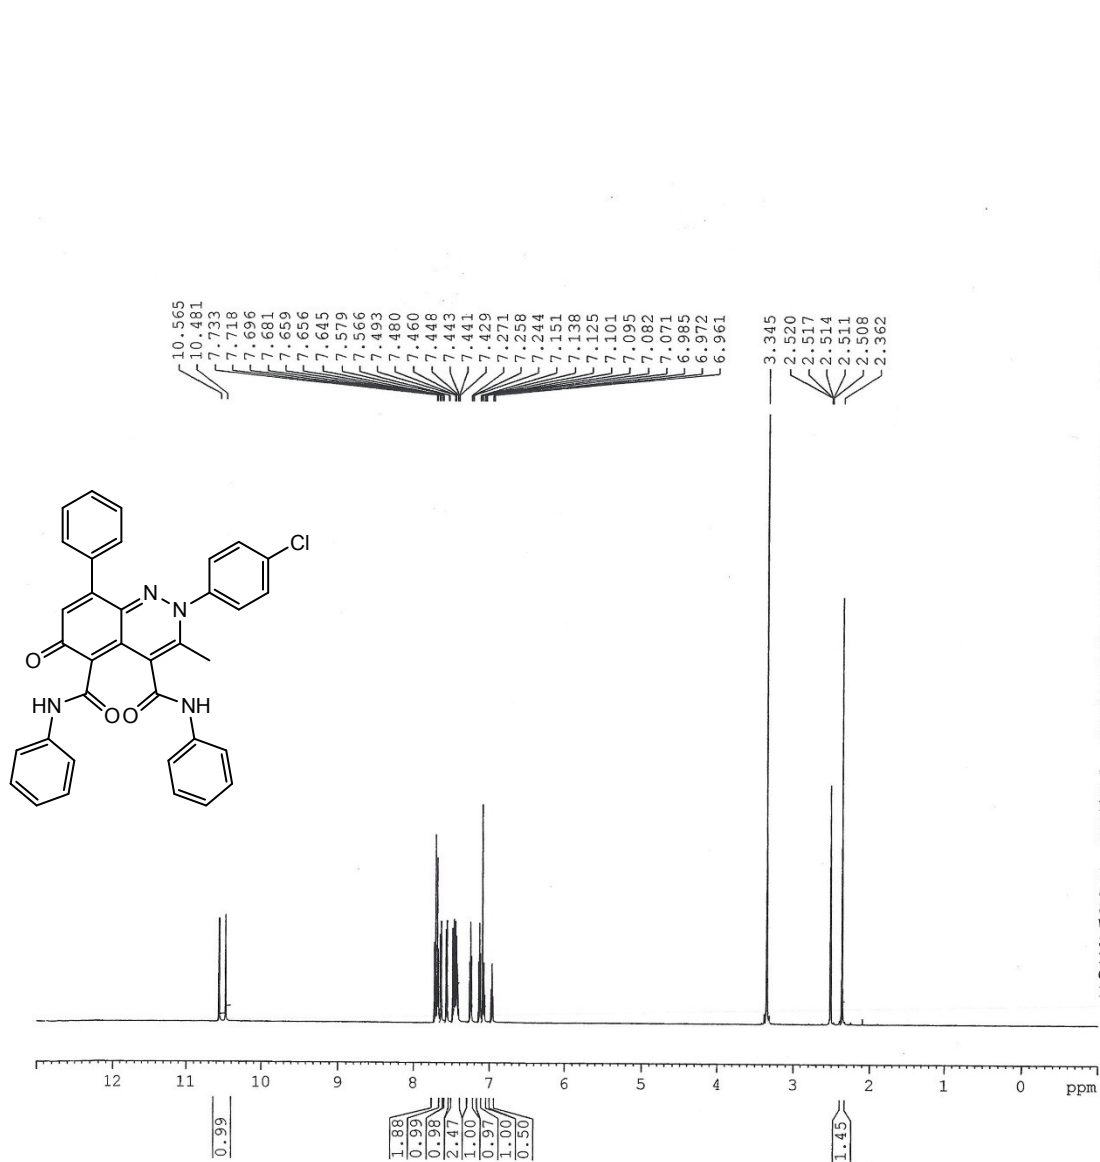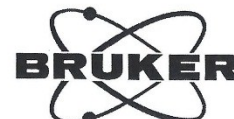

Current Data Parameters  
 NAME 86AH-1H  
 EXPNO 1  
 PROCNO 1

F2 - Acquisition Parameters  
 Date 20170504  
 Time 10.40  
 INSTRUM spect  
 PROBHD 5 mm PABBO BB-  
 PULPROG zg30  
 TD 65536  
 SOLVENT DMSO  
 NS 16  
 DS 2  
 SWH 12335.526 Hz  
 FIDRES 0.188225 Hz  
 AQ 2.6563926 sec  
 RG 203  
 DW 40.533 usec  
 DE 20.00 usec  
 TE 298.0 K  
 D1 1.00000000 sec  
 TD0 1

===== CHANNEL f1 =====  
 SFO1 600.1337060 MHz  
 NUC1 1H  
 P1 10.60 usec  
 PLW1 27.82500076 W

F2 - Processing parameters  
 SI 32768  
 SF 600.1300000 MHz  
 WDW EM  
 SSB 0  
 LB 0.30 Hz  
 GB 0  
 PC 1.00

**2-(4-Chlorophenyl)-3-methyl-6-oxo-*N*<sup>4</sup>,*N*<sup>5</sup>,8-triphenyl-2,6-dihydrocinnoline-4,5-dicarboxamide (3b)**

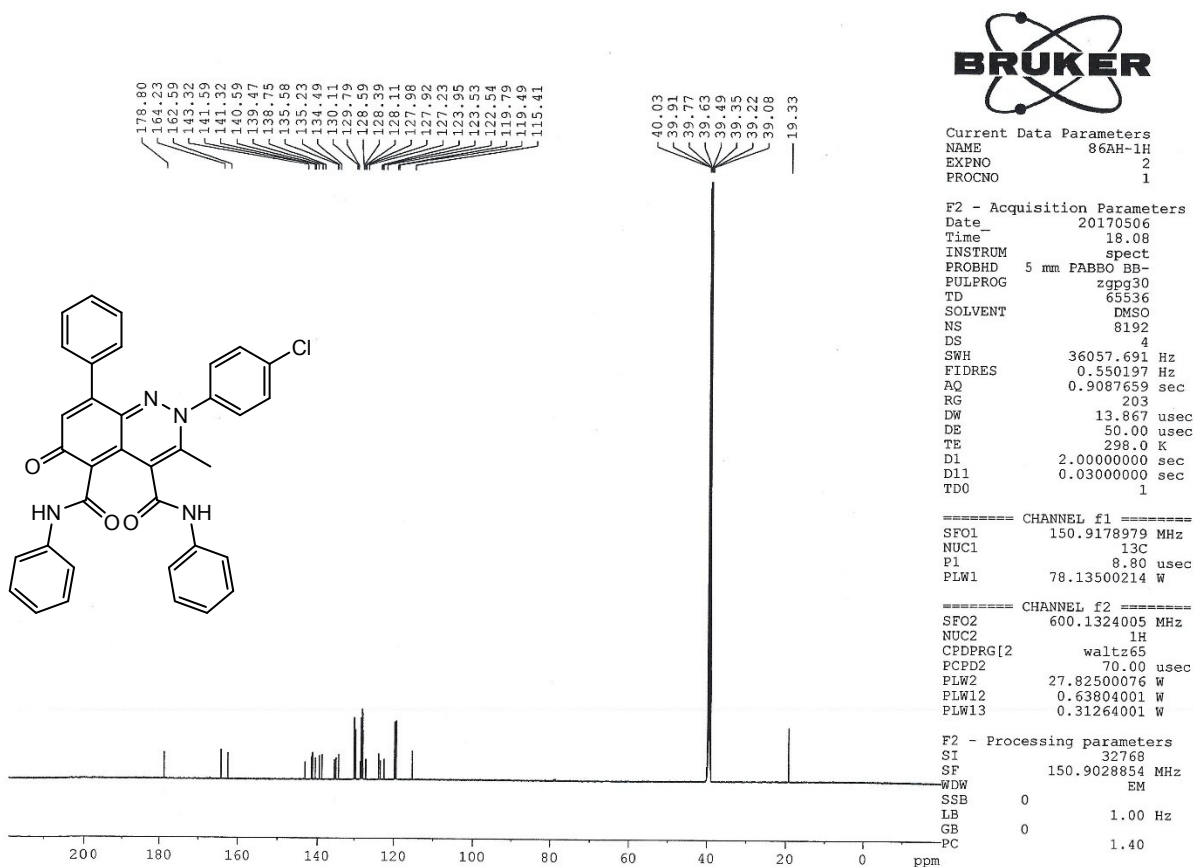

**2-(4-Chlorophenyl)-3-methyl-6-oxo-*N*<sup>4</sup>,*N*<sup>5</sup>,8-triphenyl-2,6-dihydrocinnoline-4,5-dicarboxamide (3b)**

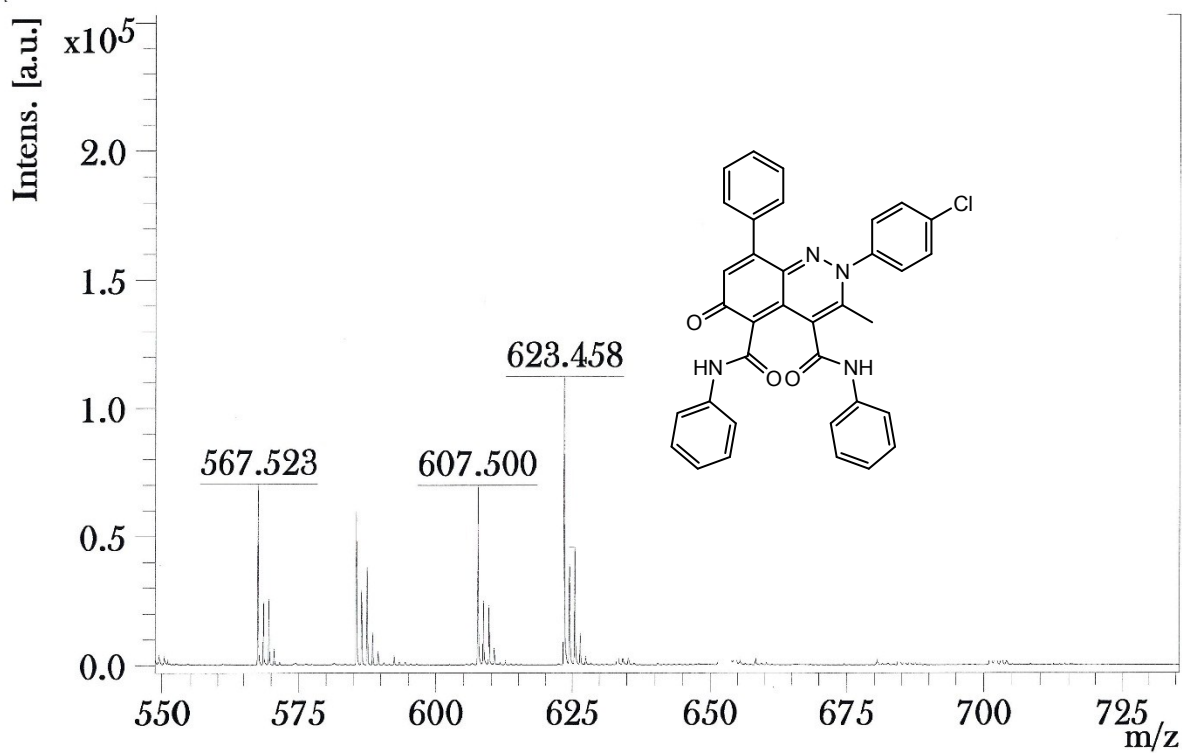

**2-(4-Bromophenyl)-8-(4-chlorophenyl)-3-methyl-6-oxo-*N*<sup>4</sup>,*N*<sup>5</sup>-diphenyl-2,6-dihydrocinnoline-4,5-dicarboxamide (3c)**

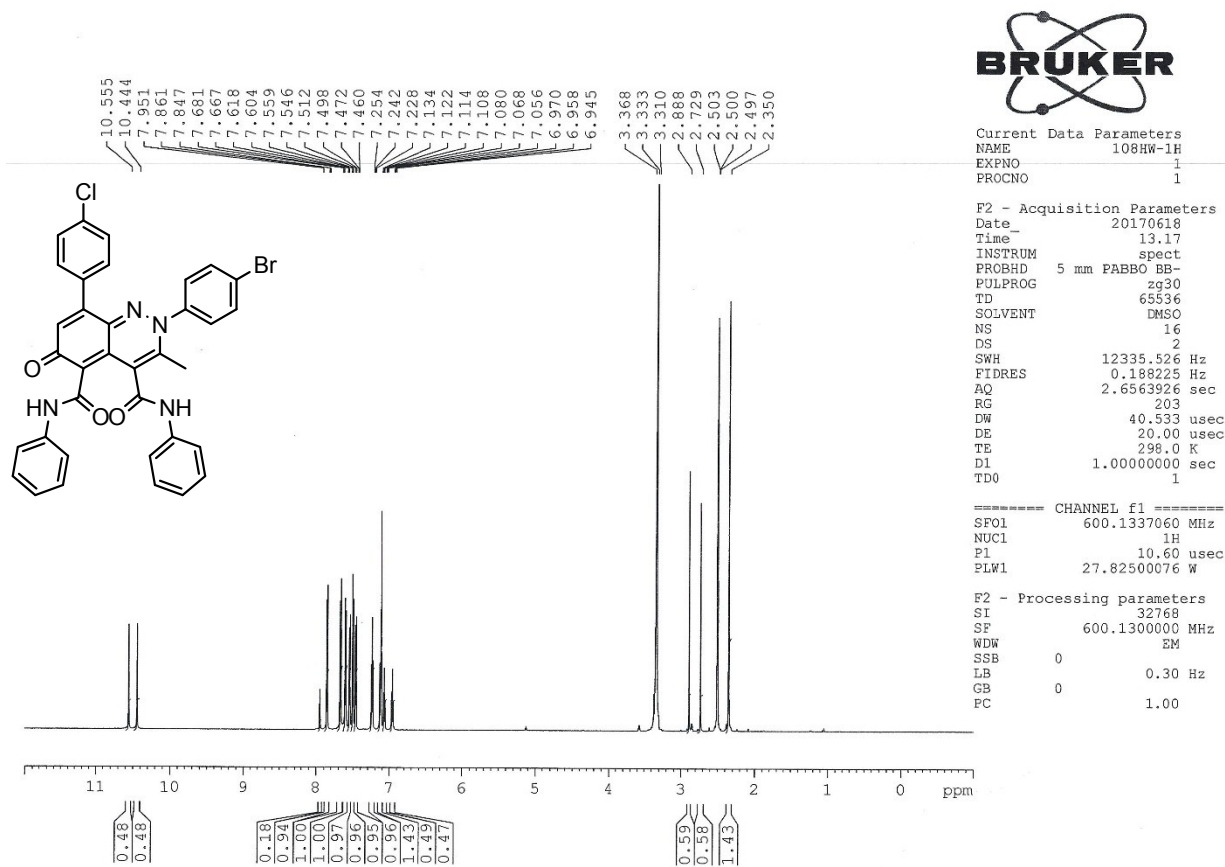



**2-(4-Bromophenyl)-8-(4-chlorophenyl)-3-methyl-6-oxo-*N*<sup>4</sup>,*N*<sup>5</sup>-diphenyl-2,6-dihydrocinnoline-4,5-dicarboxamide (3c)**

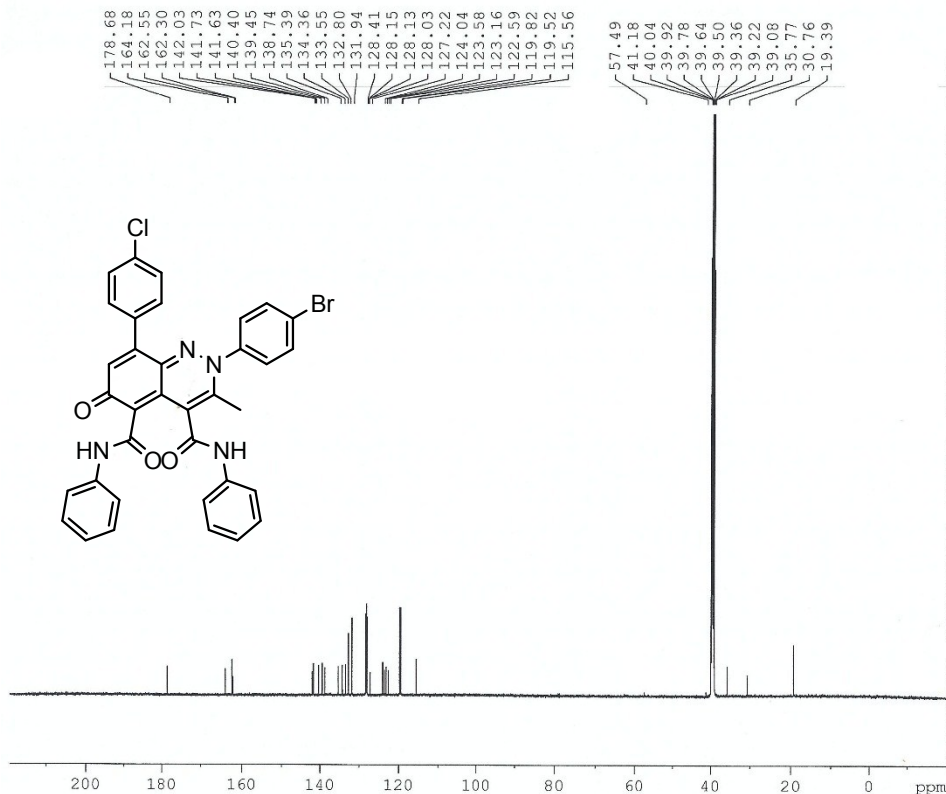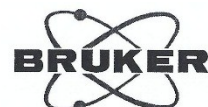

Current Data Parameters  
 NAME 106HW-1H  
 EXPNO 2  
 PROCNO 1

F2 - Acquisition Parameters  
 Date\_ 20170619  
 Time 7.40  
 INSTRUM spect  
 PROBHD 5 mm PABBO BB-  
 PULPROG zgpg30  
 TD 65536  
 SOLVENT DMSO  
 NS 14336  
 DS 4  
 SWH 36057.691 Hz  
 FIDRES 0.550197 Hz  
 AQ 0.9087659 sec  
 RG 203  
 DW 13.867 usec  
 DE 50.00 usec  
 TE 298.0 K  
 D1 2.00000000 sec  
 D11 0.03000000 sec  
 TDO 1

----- CHANNEL f1 -----  
 SF01 150.9178979 MHz  
 NUC1 13C  
 P1 8.80 usec  
 PLW1 78.13500214 W

----- CHANNEL f2 -----  
 SF02 600.1324005 MHz  
 NUC2 1H  
 CPDPRG[2] waltz65  
 PCPD2 70.00 usec  
 PLW2 27.82500076 W  
 PLW12 0.63804001 W  
 PLW13 0.31264001 W

F2 - Processing parameters  
 SI 32768  
 SF 150.9028804 MHz  
 WDW EM  
 SSB 0  
 LB 1.00 Hz  
 GB 0  
 PC 1.40

**2-(4-Bromophenyl)-8-(4-chlorophenyl)-3-methyl-6-oxo-*N*<sup>4</sup>,*N*<sup>5</sup>-diphenyl-2,6-dihydrocinnoline-4,5-dicarboxamide (3c)**

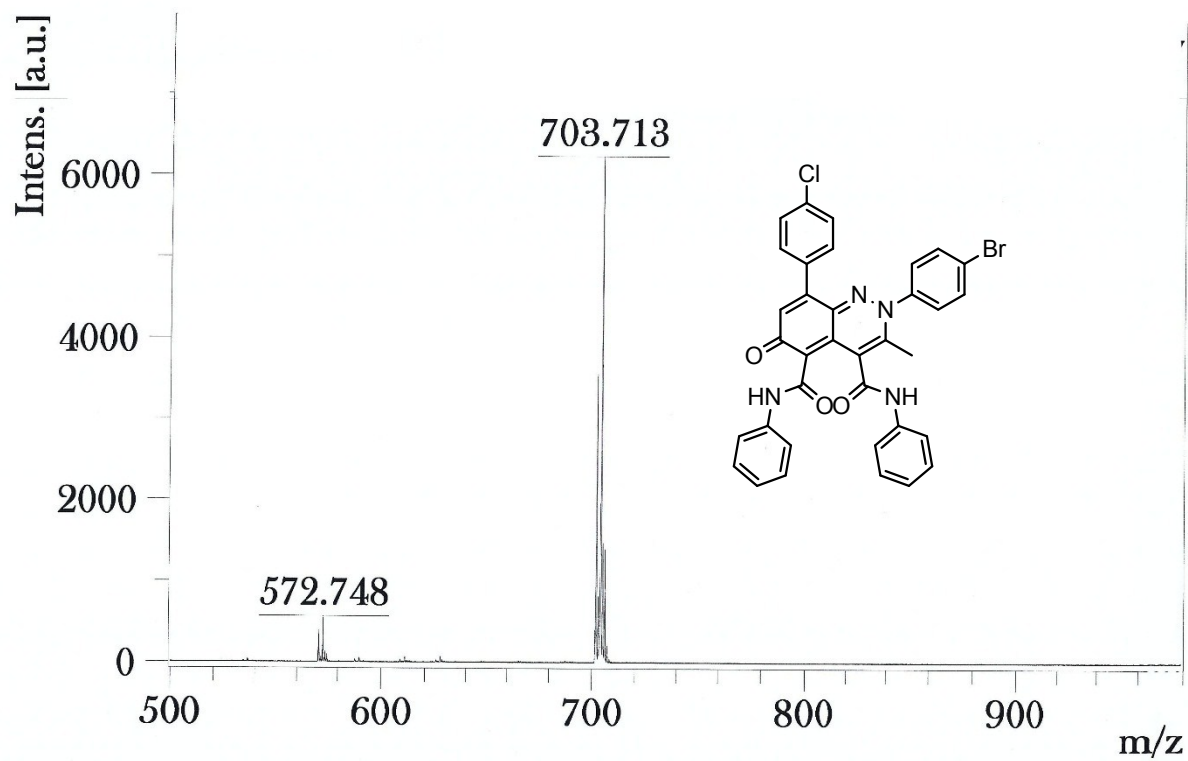

**8-(4-Bromophenyl)-2-(4-chlorophenyl)-3-methyl-6-oxo-*N*<sup>4</sup>,*N*<sup>5</sup>-diphenyl-2,6-dihydrocinnoline-4,5-dicarboxamide (3d)**

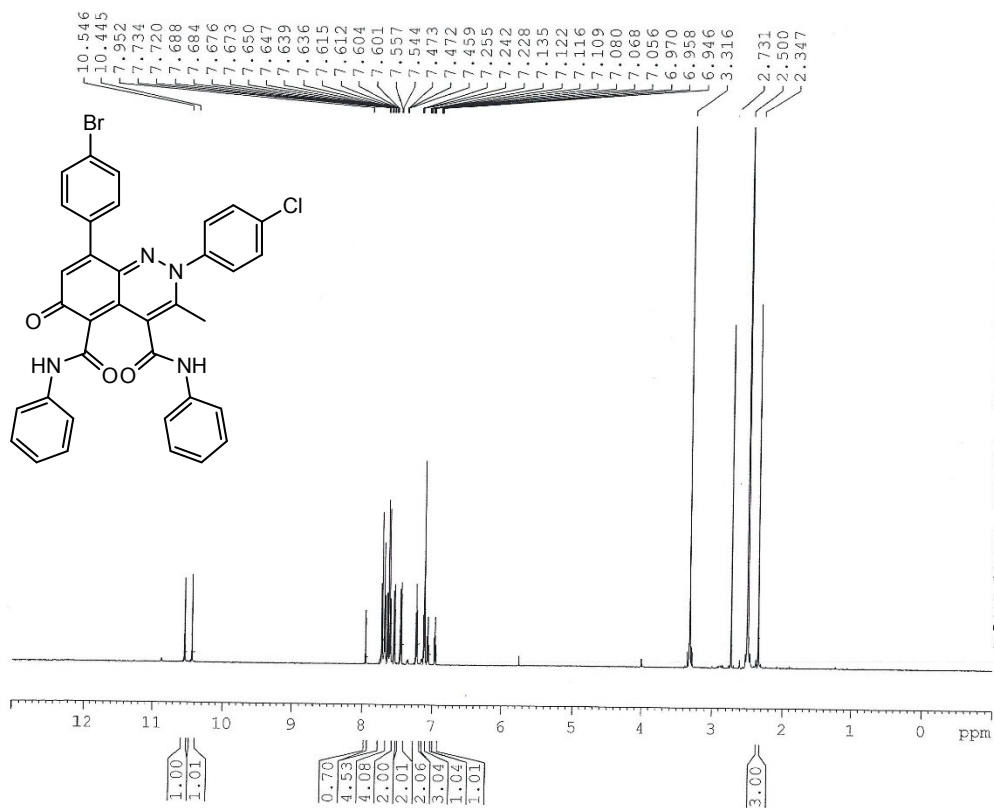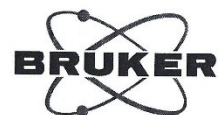

Current Data Parameters  
 NAME 126HW  
 EXPNO 1  
 PROCNO 1

F2 - Acquisition Parameters  
 Date\_ 20170807  
 Time 10.34  
 INSTRUM spect  
 FROBHD 5 mm PABBO BB-  
 FULPROG zg30  
 TD 65536  
 SOLVENT DMSO  
 NS 16  
 DS 2  
 SWH 12335.526 Hz  
 FIDRES 0.188225 Hz  
 AQ 2.6563926 sec  
 RG 203  
 DW 40.533 usec  
 DE 20.00 usec  
 TE 298.0 K  
 D1 1.0000000 sec  
 TDO 1

===== CHANNEL f1 =====  
 SFO1 600.1337060 MHz  
 NUC1 1H  
 P1 10.60 usec  
 PLW1 27.82500076 W

F2 - Processing parameters  
 SI 32768  
 SF 600.1300000 MHz  
 WDW EM  
 SSB 0  
 LB 0.30 Hz  
 GB 0  
 PC 1.00

**8-(4-Bromophenyl)-2-(4-chlorophenyl)-3-methyl-6-oxo-*N*<sup>4</sup>,*N*<sup>5</sup>-diphenyl-2,6-dihydrocinnoline-4,5-dicarboxamide (3d)**

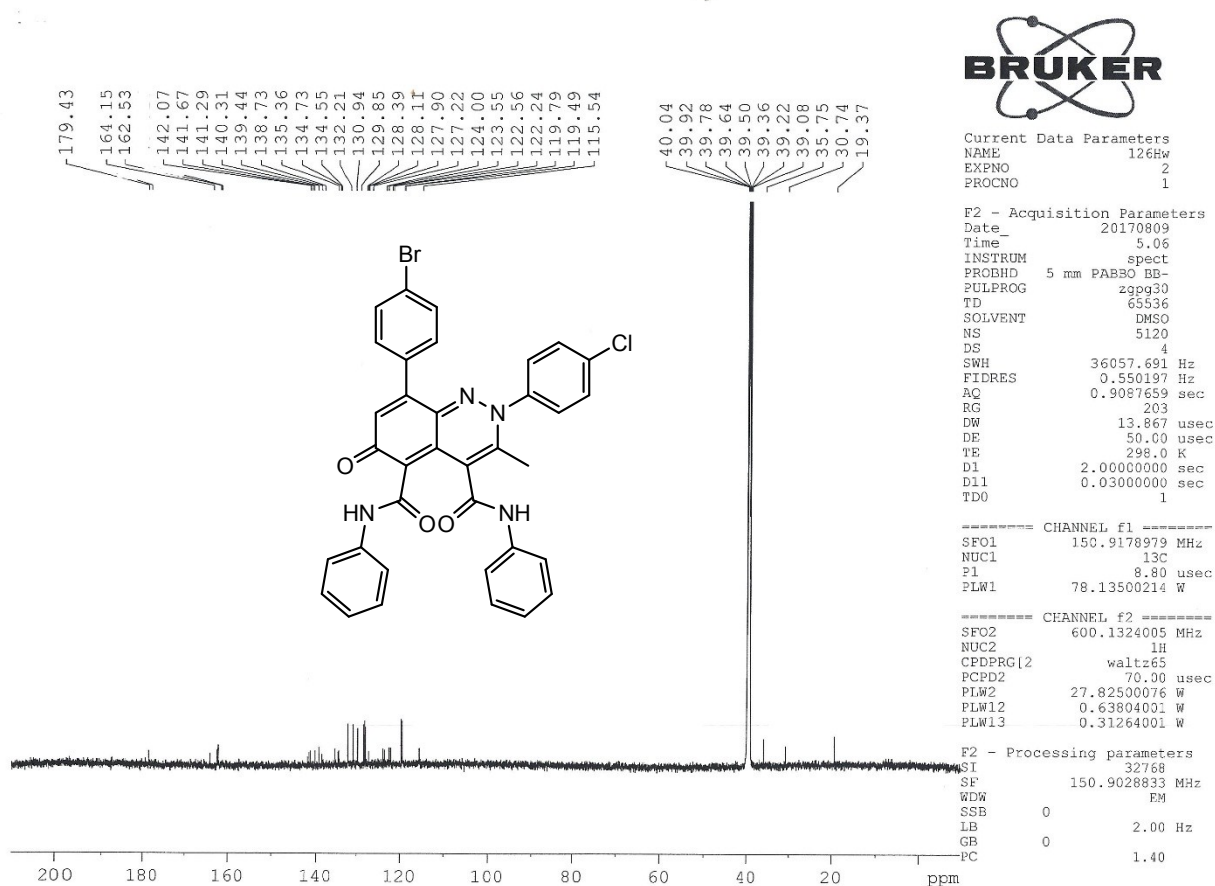

**8-(4-Bromophenyl)-2-(4-chlorophenyl)-3-methyl-6-oxo-*N*<sup>4</sup>,*N*<sup>5</sup>-diphenyl-2,6-dihydrocinnoline-4,5-dicarboxamide (3d)**

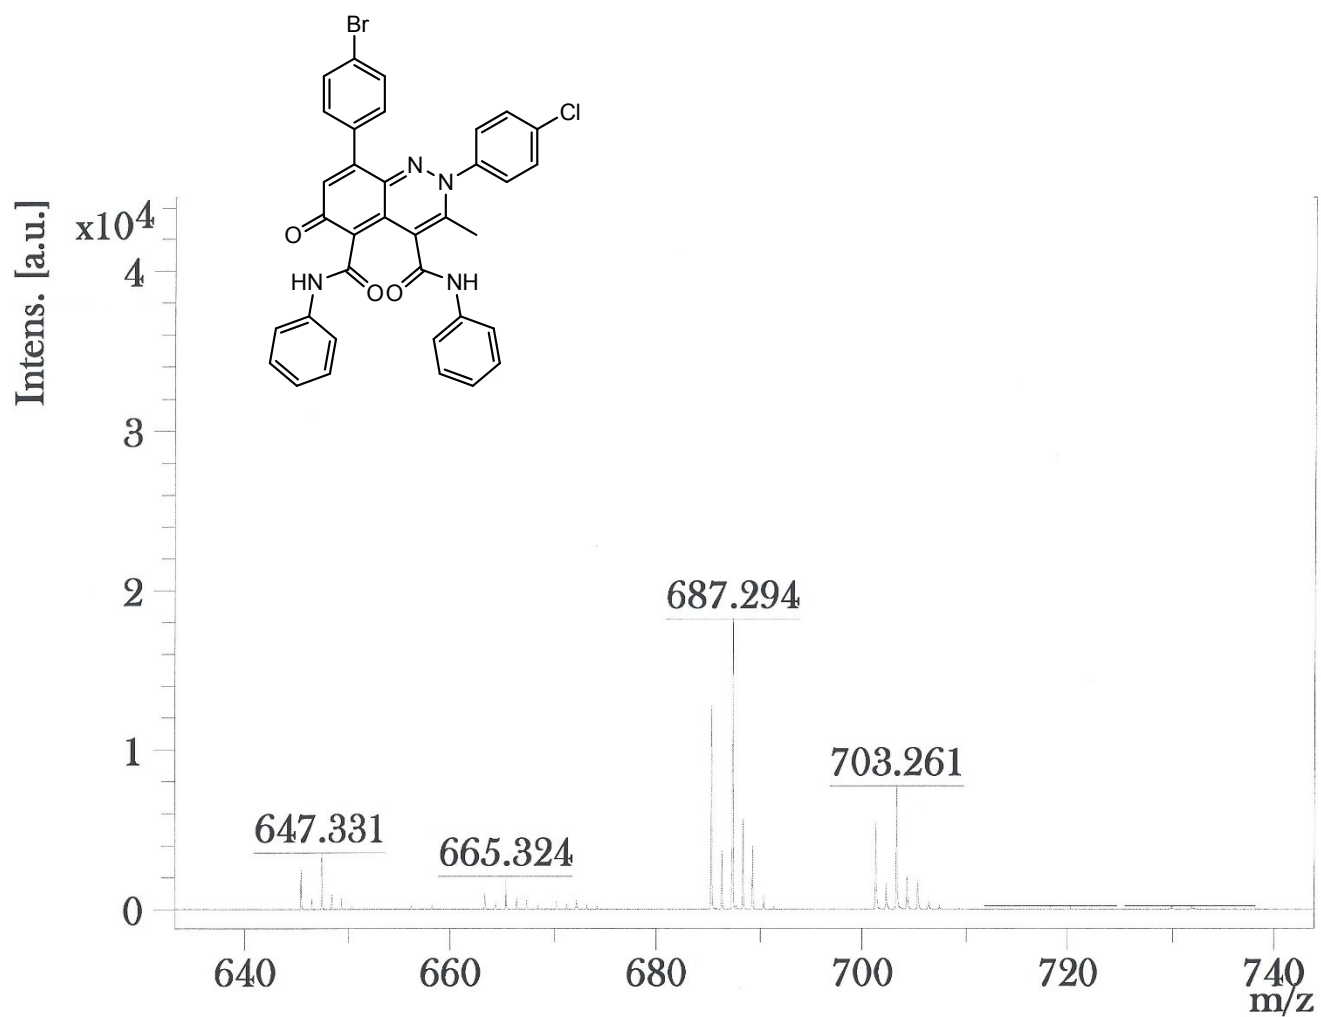

**2,8-Di(4-bromophenyl)-3-methyl-6-oxo-*N*<sup>4</sup>,*N*<sup>5</sup>-diphenyl-2,6-dihydrocinnoline-4,5-dicarboxamide (3e)**

1H spectra Dr.Hamad 129HW in DMSO

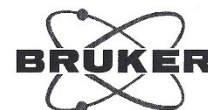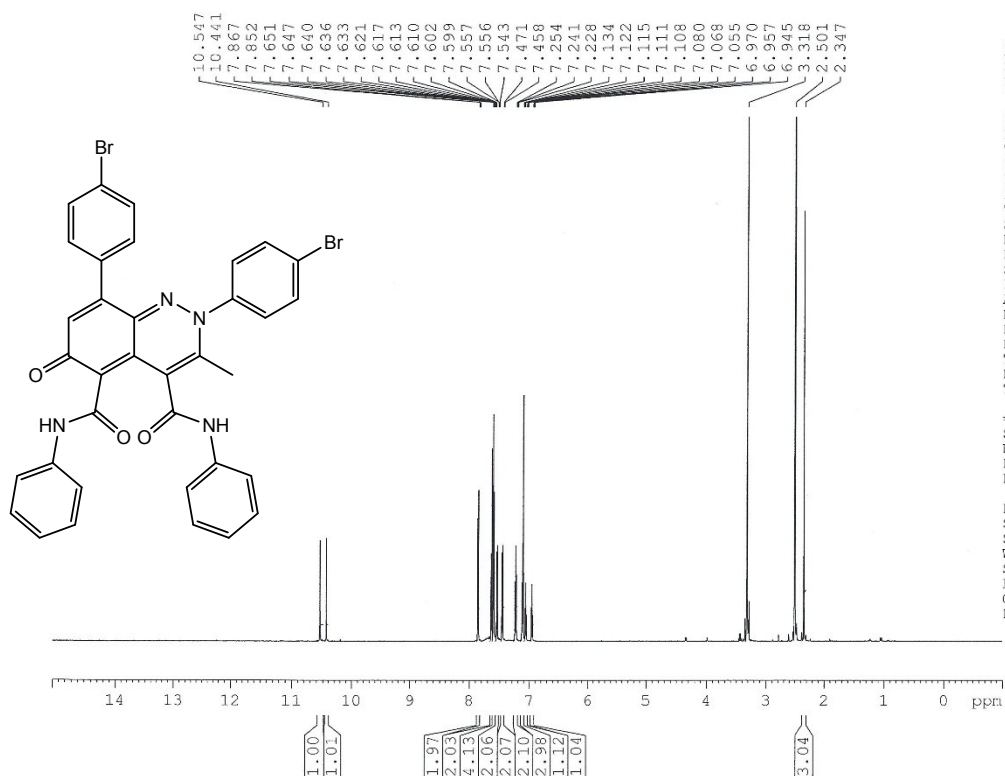

Current Data Parameters  
 NAME 129Hw  
 EXPNO 1  
 PROCNO 1

F2 - Acquisition Parameters  
 Date 20170807  
 Time 10.40  
 INSTRUM spect  
 PROBHD 5 mm PABBO BB-  
 PULPROG zg30  
 TD 65536  
 SOLVENT DMSO  
 NS 16  
 DS 2  
 SWH 12335.526 Hz  
 FIDRES 0.188225 Hz  
 AQ 2.6563926 sec  
 RG 203  
 DW 40.533 usec  
 DE 20.00 usec  
 TE 298.0 K  
 D1 1.0000000 sec  
 TDC 1

===== CHANNEL f1 =====  
 SF01 600.1337060 MHz  
 NUC1 1H  
 F1 10.60 usec  
 PLW1 27.82500076 W

F2 - Processing parameters  
 SI 32768  
 SF 600.1300000 MHz  
 WDW EM  
 SSB 0  
 LB 0.30 Hz  
 GB 0  
 PC 1.00

**2,8-Di(4-bromophenyl)-3-methyl-6-oxo-*N*<sup>4</sup>,*N*<sup>5</sup>-diphenyl-2,6-dihydrocinnoline-4,5-dicarboxamide (3e)**

13C decoupled spectra Dr.Hamad 129HW in DMSO

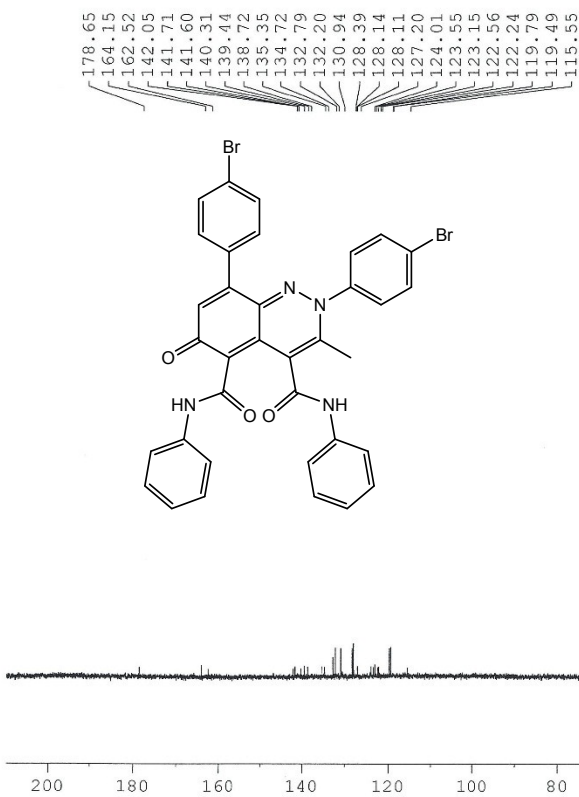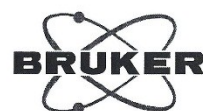

Current Data Parameters  
 NAME 129HW  
 EXPNO 2  
 PROCNO 1

F2 - Acquisition Parameters  
 Date\_ 20170809  
 Time\_ 8.35  
 INSTRUM spect  
 PROBHD 5 mm PABBO BB-  
 PULPROG zgpg30  
 TD 65536  
 SOLVENT DMSO  
 NS 4096  
 DS 4  
 SWH 36057.691 Hz  
 FIDRES 0.550197 Hz  
 AQ 0.9087659 sec  
 RG 203  
 DW 13.867 usec  
 DE 50.00 usec  
 TE 298.0 K  
 D1 2.0000000 sec  
 D11 0.0300000 sec  
 TD0 1

----- CHANNEL f1 -----  
 SF01 150.9178979 MHz  
 NUC1 13C  
 P1 8.80 usec  
 PLW1 78.13500214 W

----- CHANNEL f2 -----  
 SFC2 600.1324005 MHz  
 NUC2 1H  
 CPDPRG[2] waltz65  
 PCPD2 70.00 usec  
 PLW2 27.82500076 W  
 PLW12 0.63804001 W  
 PLW13 0.31264001 W

F2 - Processing parameters  
 SI 32768  
 SF 150.9028835 MHz  
 WFV EM  
 SSR 0  
 LB 2.00 Hz  
 GB 0  
 PC 1.40

**2-(4-Chlorophenyl)-8-(4-fluorophenyl)-3-methyl-6-oxo-*N*<sup>4</sup>,*N*<sup>5</sup>-diphenyl-2,6-dihydrocinnoline-4,5-dicarboxamide (3f)**

<sup>1</sup>H spectra Dr.Hamad 138 HW in DMSO

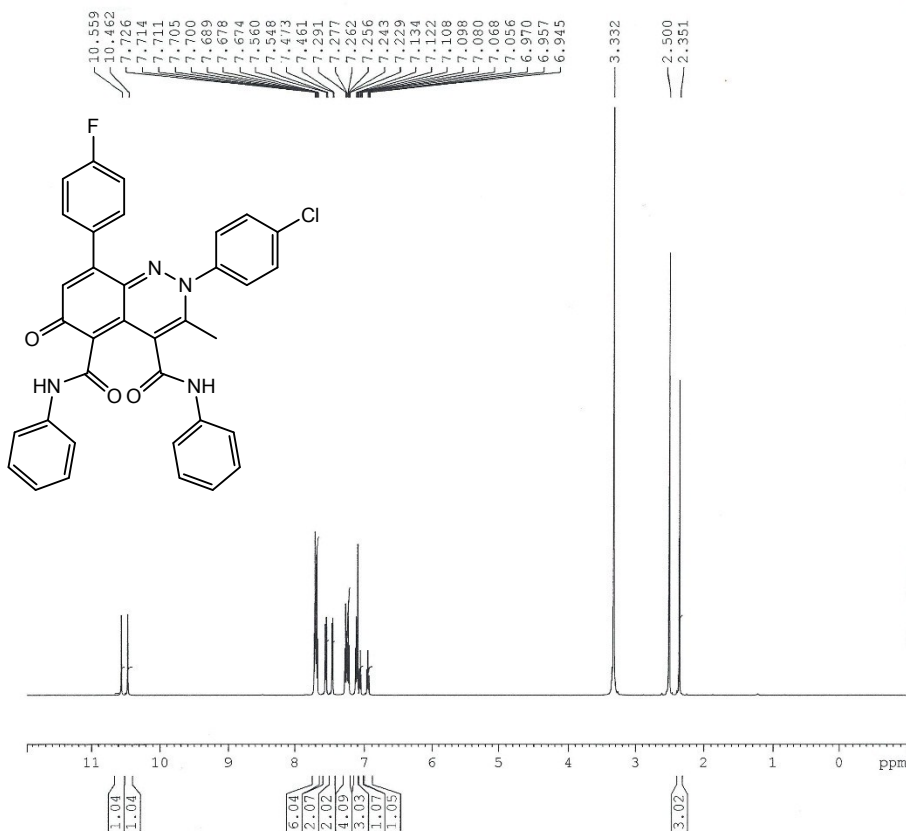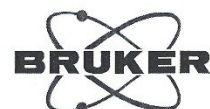

Current Data Parameters  
 NAME 138HW  
 EXPNO 1  
 PROCNO 1

F2 - Acquisition Parameters  
 Date\_ 20171022  
 Time 12.20  
 INSTRUM spect  
 PROBHD 5 mm PABBO BB-  
 PULPROG zg30  
 TD 65536  
 SOLVENT DMSO  
 NS 16  
 DS 2  
 SWH 12335.526 Hz  
 FIDRES 0.188225 Hz  
 AQ 2.6563926 sec  
 RG 203  
 DW 40.533 usec  
 DE 20.00 usec  
 TE 298.0 K  
 D1 1.0000000 sec  
 TDO 1

===== CHANNEL f1 =====  
 SF01 600.1337060 MHz  
 NUC1 1H  
 P1 10.60 usec  
 PLW1 27.82500076 W

F2 - Processing parameters  
 SI 32768  
 SF 600.1300000 MHz  
 WDW EM  
 SSB 0  
 LB 0.30 Hz  
 GB 0  
 PC 1.00



**2-(4-Chlorophenyl)-8-(4-fluorophenyl)-3-methyl-6-oxo-*N*<sup>4</sup>,*N*<sup>5</sup>-diphenyl-2,6-dihydrocinnoline-4,5-dicarboxamide (3f)**

13C decoupled spectrum Dr.Hamad 138 Hw in DMSO

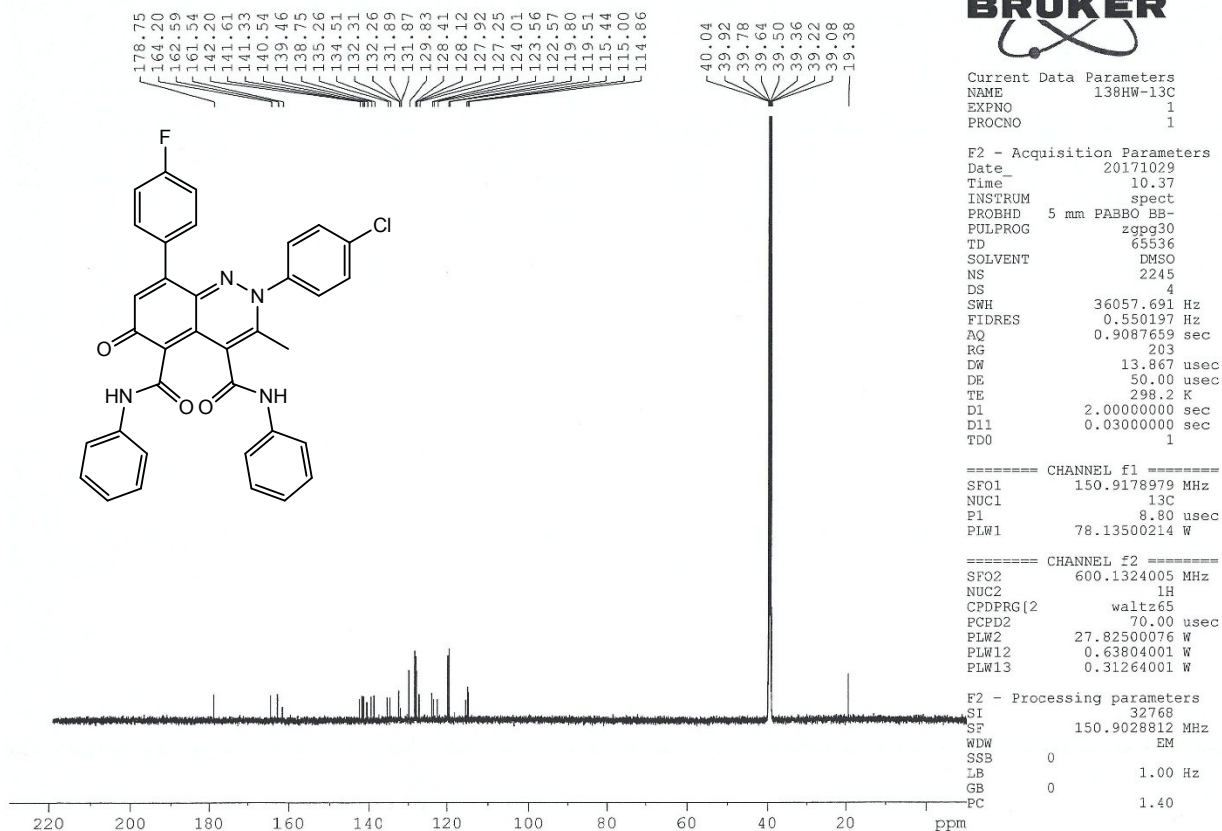

**2-(4-Bromophenyl)-8-(4-fluorophenyl)-3-methyl-6-oxo-*N*<sup>4</sup>,*N*<sup>5</sup>-diphenyl-2,6-dihydrocinnoline-4,5-dicarboxamide (3g)**

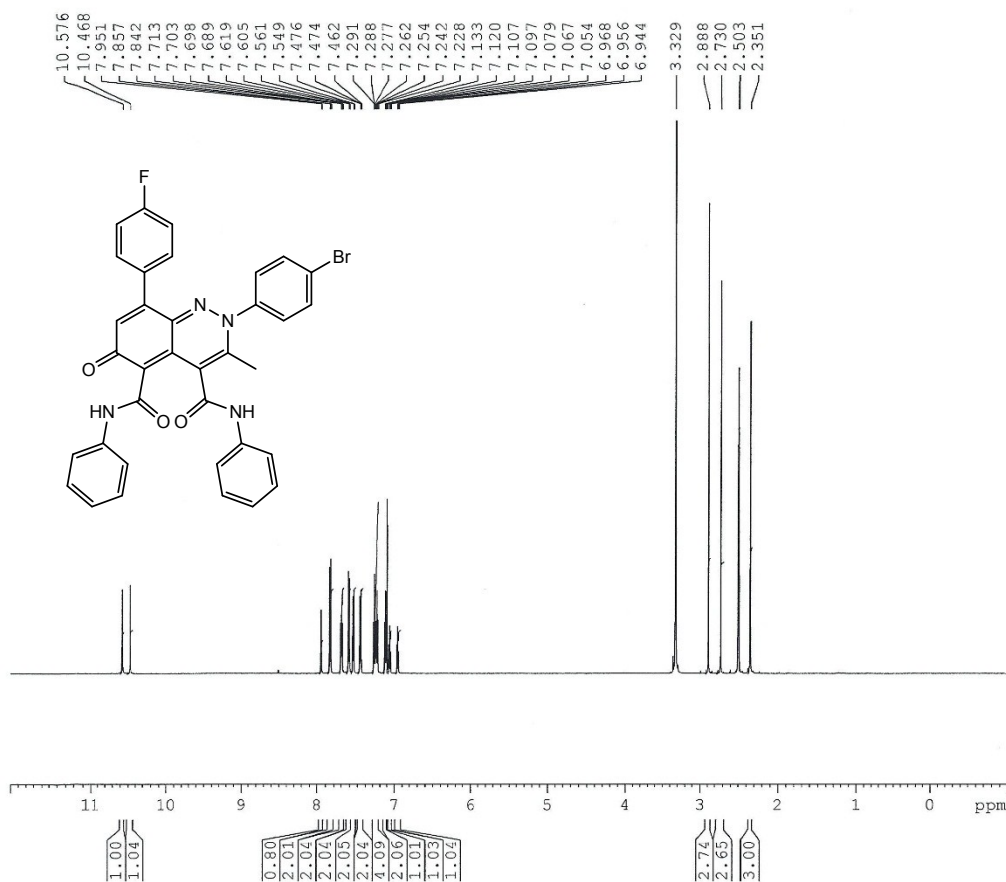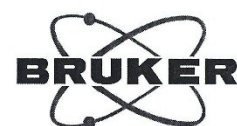

Current Data Parameters  
 NAME 136HW-1H  
 EXPNO 1  
 PROCNO 1

F2 - Acquisition Parameters  
 Date\_ 20171015  
 Time 12.31  
 INSTRUM spect  
 PROBHD 5 mm PABBO BB-  
 PULPROG zg30  
 TD 65536  
 SOLVENT DMSO  
 NS 16  
 DS 2  
 SWH 12335.526 Hz  
 FIDRES 0.188225 Hz  
 AQ 2.6563926 sec  
 RG 203  
 DW 40.533 usec  
 DE 20.00 usec  
 TE 298.0 K  
 D1 1.0000000 sec  
 TD0 1

===== CHANNEL f1 =====  
 SFO1 600.1337060 MHz  
 NUC1 1H  
 P1 10.60 usec  
 PLW1 27.82500076 W

F2 - Processing parameters  
 SI 32768  
 SF 600.1300000 MHz  
 WDW EM  
 SSB 0  
 LB 0.30 Hz  
 GB 0  
 PC 1.00

**2-(4-Bromophenyl)-8-(4-fluorophenyl)-3-methyl-6-oxo-*N*<sup>4</sup>,*N*<sup>5</sup>-diphenyl-2,6-dihydrocinnoline-4,5-dicarboxamide (3g)**

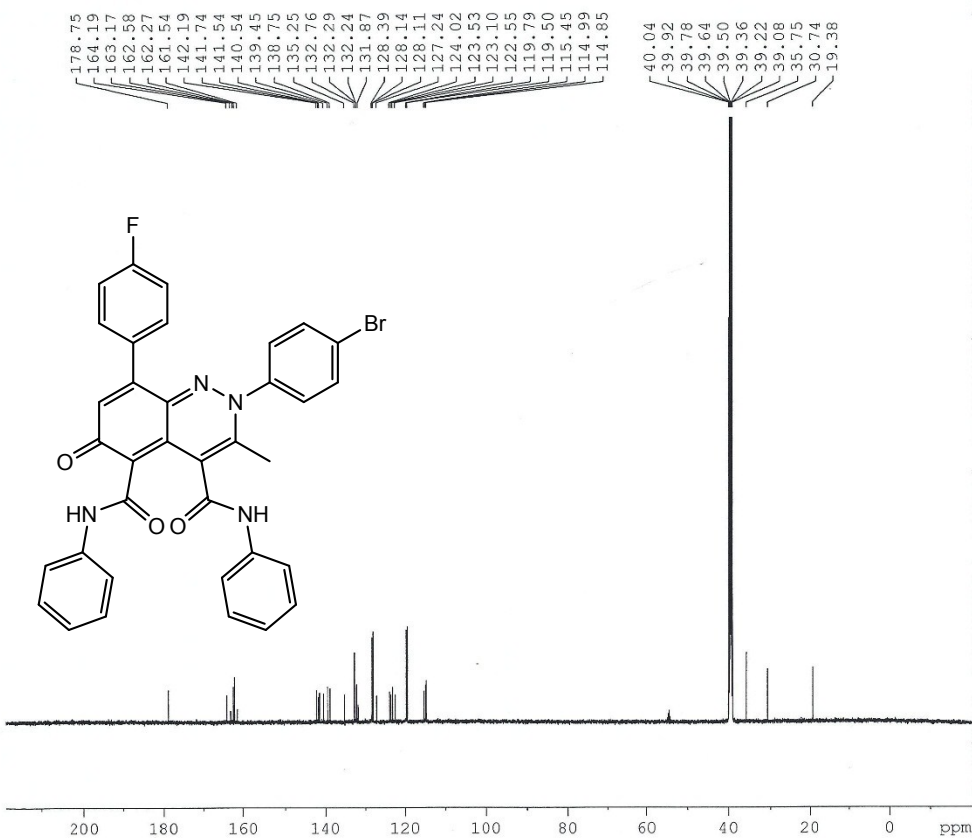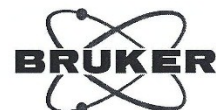

Current Data Parameters  
NAME 136HW-1H  
EXPNO 2  
PROCNO 1

F2 - Acquisition Parameters  
Date\_ 20171015  
Time\_ 14.08  
INSTRUM spect  
PROBHD 5 mm PABBO BB-  
PULPROG zgpg30  
TD 65536  
SOLVENT DMSO  
NS 5120  
DS 4  
SWH 36057.691 Hz  
FIDRES 0.550197 Hz  
AQ 0.9087659 sec  
RG 203  
DW 13.867 usec  
DE 50.00 usec  
TE 298.0 K  
D1 2.00000000 sec  
D11 0.03000000 sec  
TDO 1

===== CHANNEL f1 =====  
SFO1 150.9178979 MHz  
NUC1 13C  
P1 8.80 usec  
PLW1 78.13500214 W

===== CHANNEL f2 =====  
SFO2 600.1324005 MHz  
NUC2 1H  
CPDPRG[2] waltz65  
PCPD2 70.00 usec  
PLW2 27.82500076 W  
PLW12 0.63804001 W  
PLW13 0.31264001 W

F2 - Processing parameters  
SI 32768  
SF 150.9028827 MHz  
WDW EM  
SSB 0  
LB 1.00 Hz  
GB 0  
PC 1.40

**2-(4-Bromophenyl)-8-(4-fluorophenyl)-3-methyl-6-oxo-*N*<sup>4</sup>,*N*<sup>5</sup>-diphenyl-2,6-dihydrocinnoline-4,5-dicarboxamide (3g)**

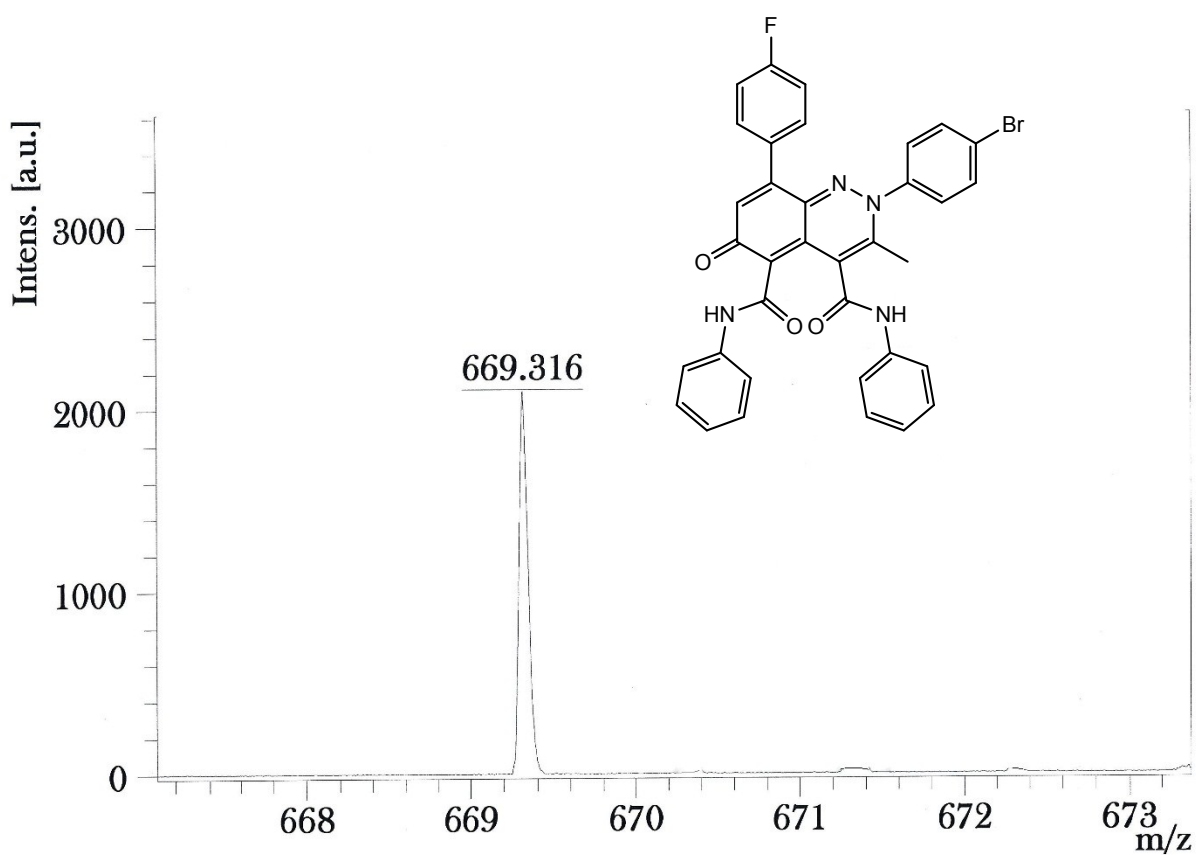

**8-(4-Anisyl)-3-methyl-6-oxo-*N*<sup>4</sup>,*N*<sup>5</sup>,2-triphenyl-2,6-dihydrocinnoline-4,5-dicarboxamide (3h)**

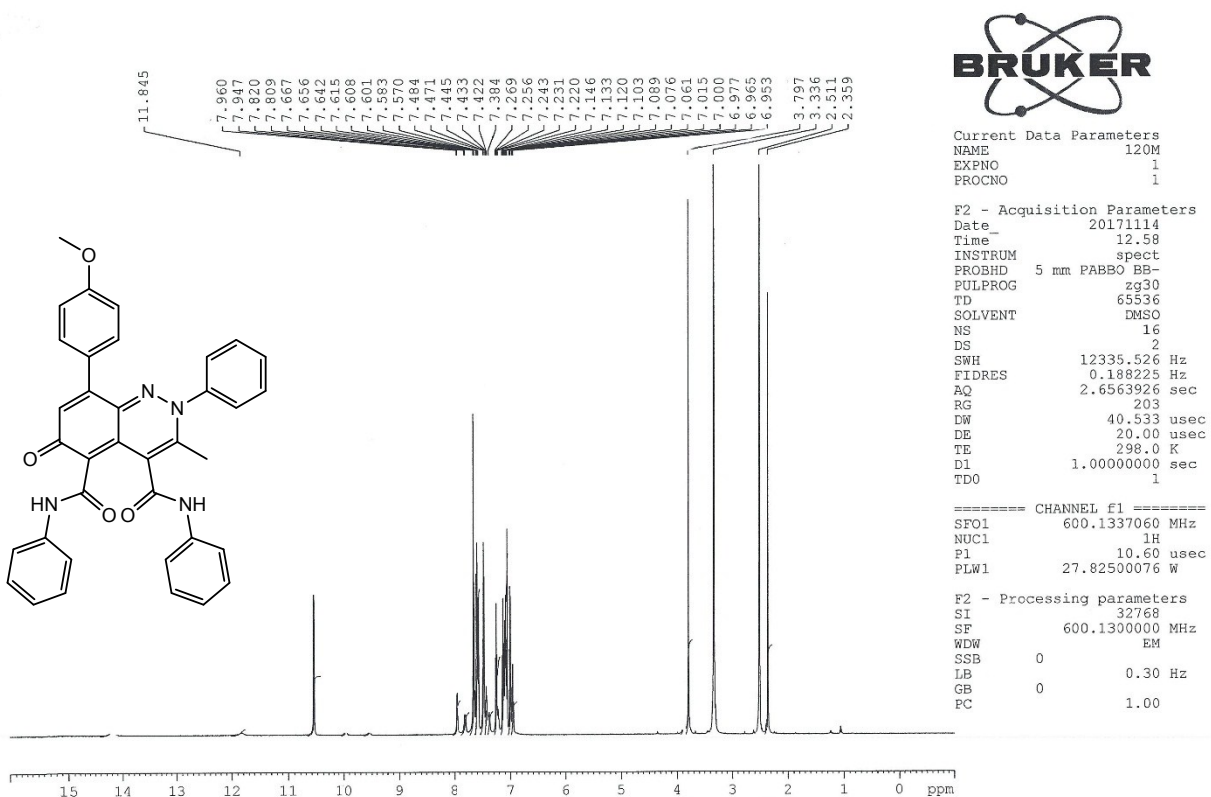

**8-(4-Anisyl)-3-methyl-6-oxo-*N*<sup>4</sup>,*N*<sup>5</sup>,2-triphenyl-2,6-dihydrocinnoline-4,5-dicarboxamide (3h)**

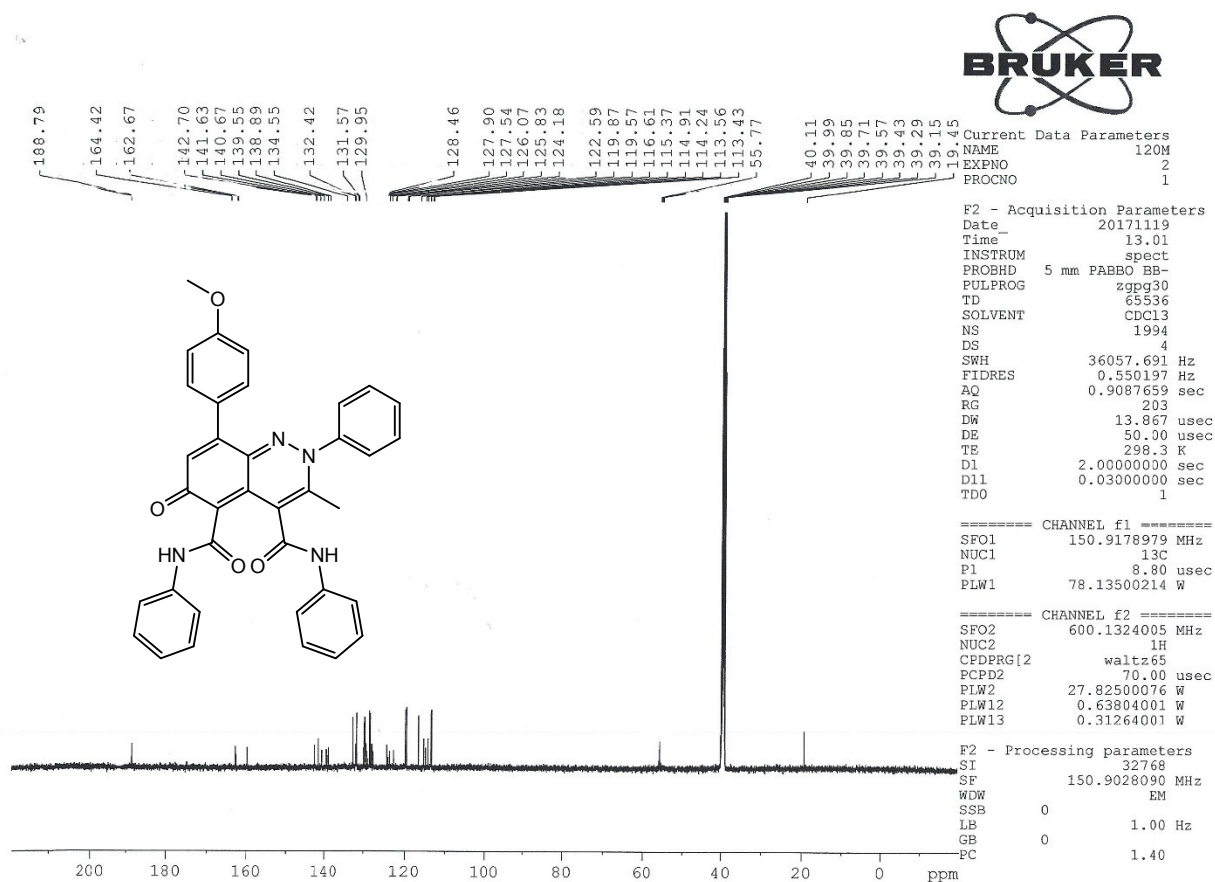

**8-(4-Anisyl)-2-(4-chlorophenyl)-3-methyl-6-oxo-*N*<sup>4</sup>,*N*<sup>5</sup>-diphenyl-2,6-dihydrocinnoline-4,5-dicarboxamide (3i)**

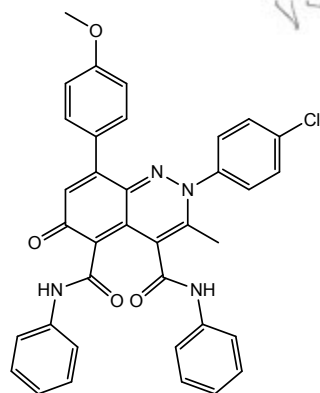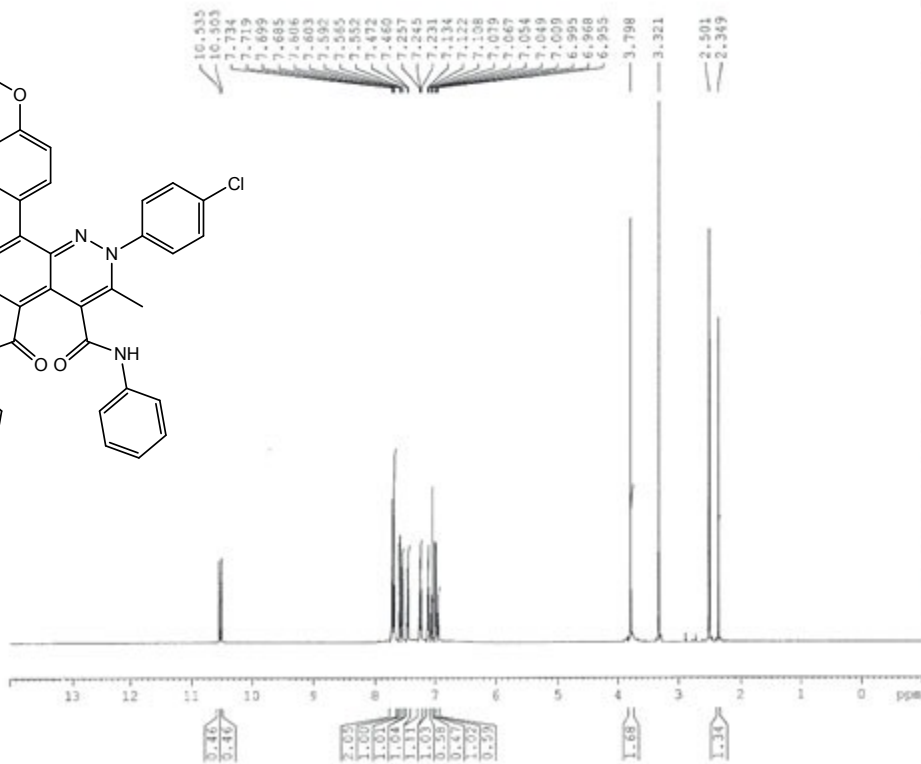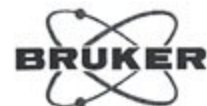

Current Data Parameters  
 NAME 100HW  
 EXPNO 3  
 PROCNO 1

F2 - Acquisition Parameters  
 Date\_ 20170809  
 Time 11.21  
 INSTRUM spect  
 PROCBD 5 mm PABBO BB-  
 PULPROG zg30  
 TD 65536  
 SOLVENT DMSO  
 NS 16  
 DS 2  
 SSW 12335.526 Hz  
 FIDRES 0.188225 Hz  
 AQ 2.4563926 sec  
 RG 203  
 DW 40.533 usec  
 DE 20.00 usec  
 TE 298.0 K  
 D1 1.00000000 sec  
 TDC 1

----- CHANNEL f1 -----  
 SFO1 600.1337060 MHz  
 NUCL1 1H  
 P1 10.60 usec  
 PLW1 27.82500076 W

F2 - Processing parameters  
 SI 32768  
 SF 600.1300000 MHz  
 MW EM  
 SSB 0  
 LB 0.30 Hz  
 GB 0  
 PC 1.00

**8-(4-Anisyl)-2-(4-chlorophenyl)-3-methyl-6-oxo-*N*<sup>4</sup>,*N*<sup>5</sup>-diphenyl-2,6-dihydrocinnoline-4,5-dicarboxamide (3i)**

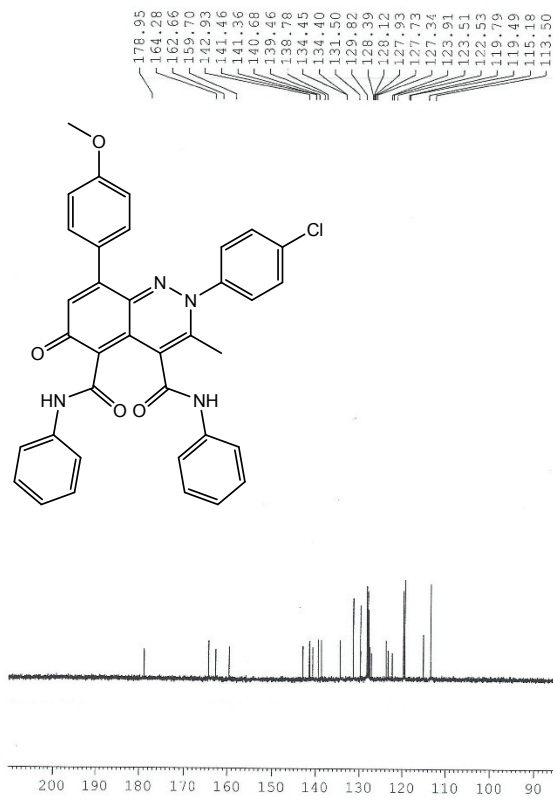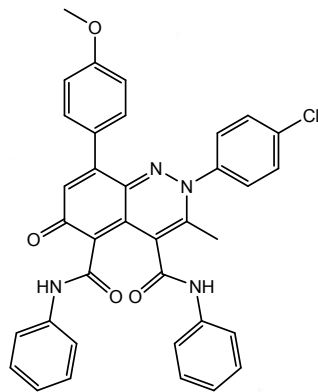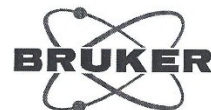

Current Data Parameters  
 NAME 100HW  
 EXPNO 4  
 PROCNO 1

F2 - Acquisition Parameters  
 Date\_ 20170812  
 Time 2.08  
 INSTRUM spect  
 PROBHD 5 mm PABBO BB-  
 PULPROG zgpg30  
 TD 65536  
 SOLVENT DMSO  
 NS 8192  
 DS 4  
 SWH 36057.691 Hz  
 FIDRES 0.550197 Hz  
 AQ 0.9087659 sec  
 RG 203  
 DW 13.867 usec  
 DE 50.00 usec  
 TE 298.0 K  
 D1 2.0000000 sec  
 D11 0.0300000 sec  
 TD0 1

===== CHANNEL f1 =====  
 SFO1 150.9178979 MHz  
 NUC1 13C  
 P1 8.80 usec  
 PLW1 78.13500214 W

===== CHANNEL f2 =====  
 SFO2 600.1324005 MHz  
 NUC2 1H  
 CPDPRG[2] waltz65  
 PCPD2 70.00 usec  
 PLW2 27.82500076 W  
 PLW12 0.63804001 W  
 PLW13 0.31264001 W

F2 - Processing parameters  
 SI 32768  
 SF 150.9028829 MHz  
 WDW EM  
 SSB 0  
 LB 1.00 Hz  
 GB 0  
 PC 1.40



**8-(4-Anisyl)-2-(4-chlorophenyl)-3-methyl-6-oxo-*N*<sup>4</sup>,*N*<sup>5</sup>-diphenyl-2,6-dihydrocinnoline-4,5-dicarboxamide (3i)**

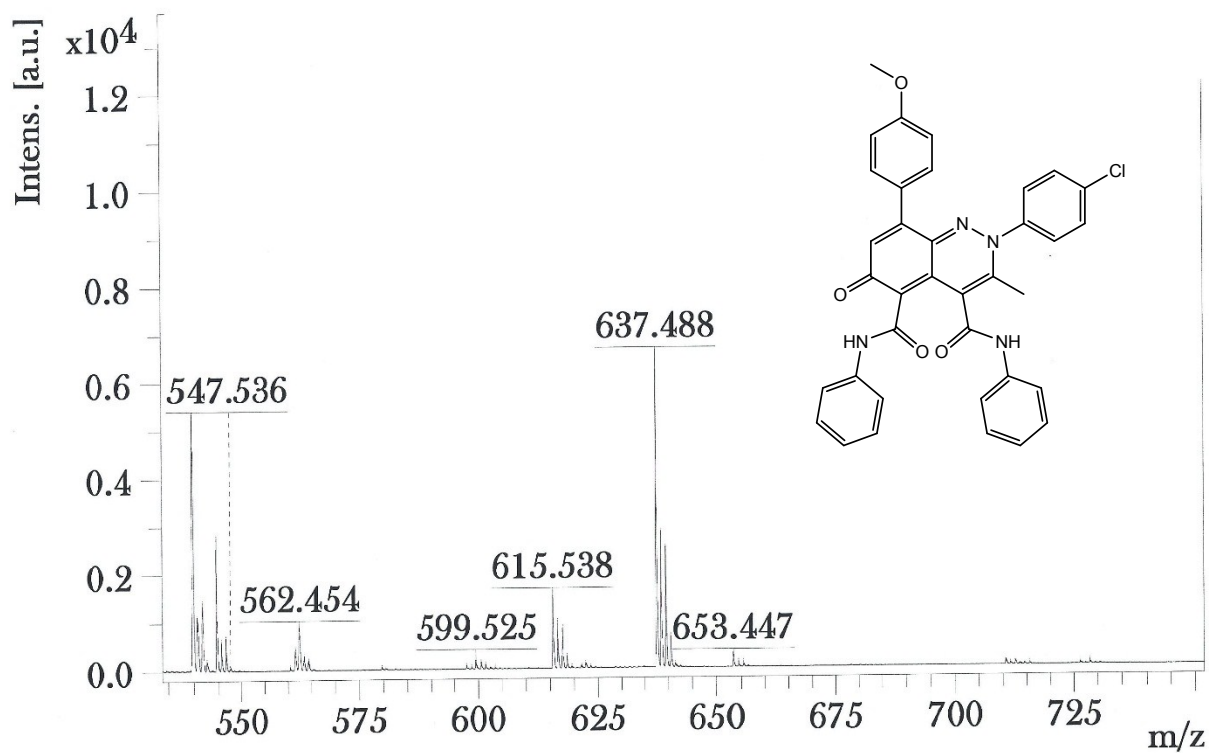

**8-(4-Anisyl)-2-(4-bromophenyl)-3-methyl-6-oxo-*N*<sup>4</sup>,*N*<sup>5</sup>-diphenyl-2,6-dihydrocinnoline-4,5-dicarboxamide (3j)**

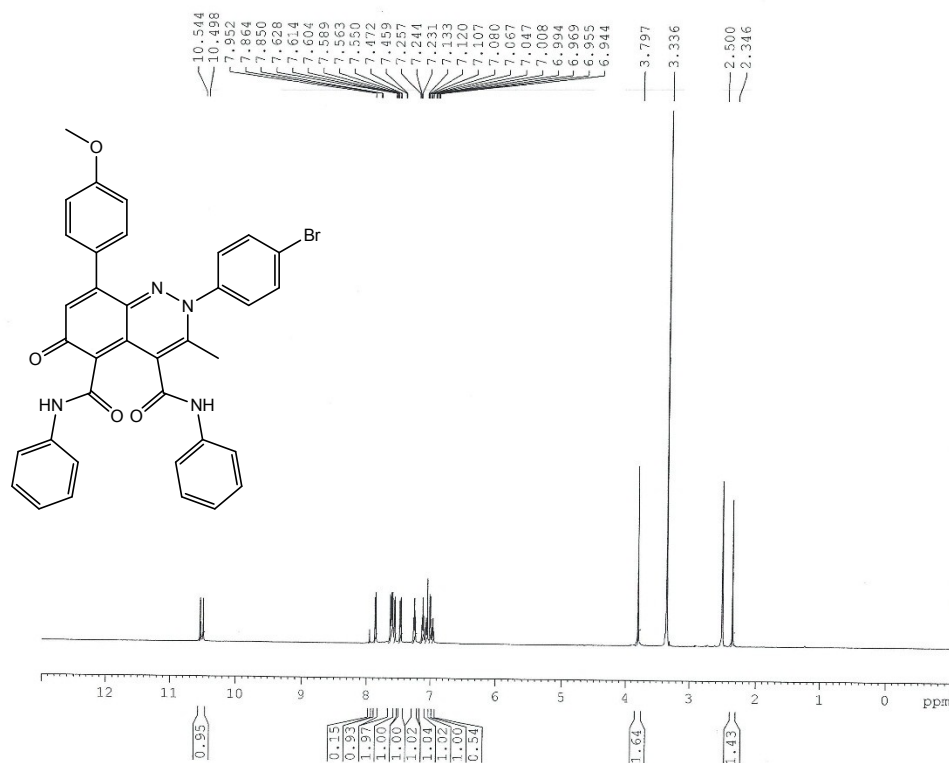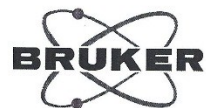

Current Data Parameters  
 NAME 118HW  
 EXPNO 1  
 PROCNO 1

F2 - Acquisition Parameters  
 Date\_ 20170726  
 Time\_ 13.55  
 INSTRUM spect  
 PROBHD 5 mm PABBO BB-  
 PULPROG zg30  
 TD 65536  
 SOLVENT DMSO  
 NS 16  
 DS 2  
 SWH 12335.526 Hz  
 FIDRES 0.188225 Hz  
 AQ 2.6563926 sec  
 RG 203  
 DW 40.533 usec  
 DE 20.00 usec  
 TE 296.2 K  
 D1 1.0000000 sec  
 TDC 1

===== CHANNEL f1 =====  
 SFO1 600.1337060 MHz  
 NUC1 1H  
 P1 10.60 usec  
 PLW1 27.82500076 W

F2 - Processing parameters  
 SI 32768  
 SF 600.1300000 MHz  
 WDW EM  
 SSB 0  
 LB 0.30 Hz  
 GB 0  
 EC 1.00

**8-(4-Anisyl)-2-(4-bromophenyl)-3-methyl-6-oxo-N<sup>4</sup>,N<sup>5</sup>-diphenyl-2,6-dihydrocinnoline-4,5-dicarboxamide (3j)**

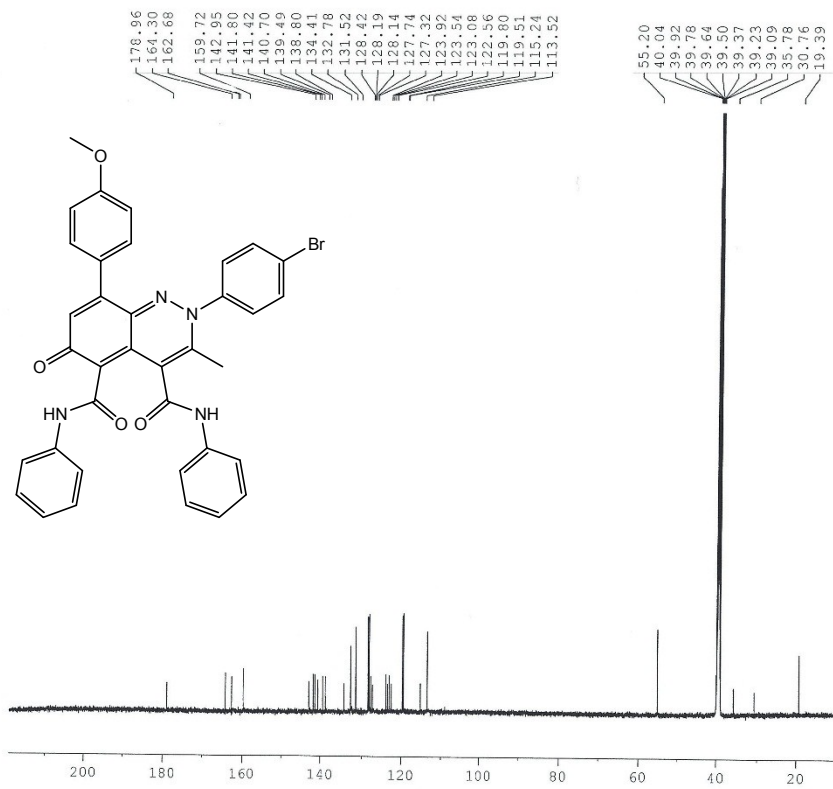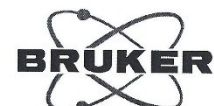

Current Data Parameters  
NAME 118HW  
EXPNO 2  
PROCNO 1

F2 - Acquisition Parameters  
Date\_ 20170727  
Time 7.42  
INSTRUM spect  
PROBHD 5 mm PABBO BB-  
PULPROG zgpg30  
TD 65536  
SOLVENT DMSO  
NS 4096  
DS 4  
SWH 36057.691 Hz  
FIDRES 0.550197 Hz  
AQ 0.9087659 sec  
RG 203  
DW 13.867 usec  
DE 50.00 usec  
TE 296.0 K  
D1 2.0000000 sec  
D11 0.03000000 sec  
TD0 1

==== CHANNEL f1 =====  
SF01 150.9178979 MHz  
NUC1 13C  
P1 8.80 usec  
PLW1 78.13500214 W

==== CHANNEL F2 =====  
SF02 600.1324005 MHz  
NUC2 1H  
PCPDPRG[2] waltz65  
PCPD2 70.00 usec  
PLW2 27.82500076 W  
PLW12 0.63804001 W  
PLW13 0.31264001 W

F2 - Processing parameters  
SI 32768  
SF 150.9028793 MHz  
WDW EM  
SSB 0  
LB 1.00 Hz  
GB 0  
PC 1.40

**8-(4-Anisyl)-3-methyl-2-(4-nitrophenyl)-6-oxo-*N*<sup>4</sup>,*N*<sup>5</sup>-diphenyl-2,6-dihydrocinnoline-4,5-dicarboxamide (3k)**

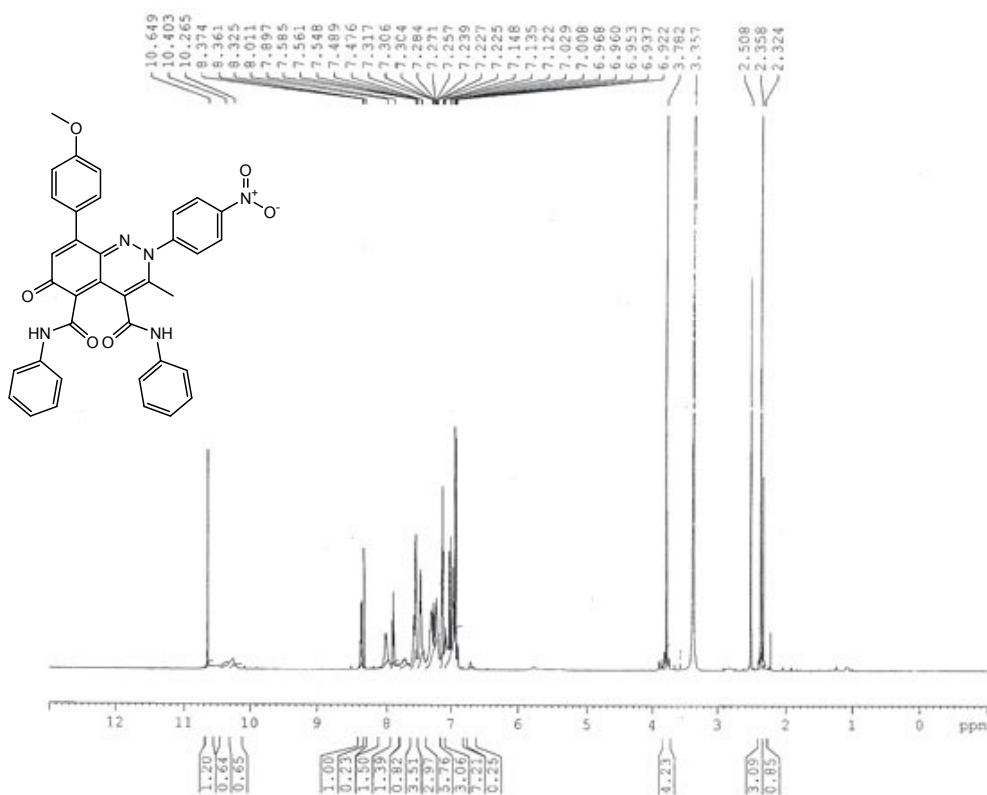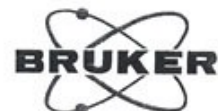

Current Data Parameters  
 NAME 119N  
 EXPNO 1  
 PROCNO 1

F2 - Acquisition Parameters  
 Date 20171225  
 Time 12.29  
 INSTRUM spect  
 PROBHD 5 mm PABBO BB-  
 PULPROG zg30  
 TD 65536  
 SOLVENT DMSO  
 NS 16  
 DS 2  
 SWH 12335.526 Hz  
 FIDRES 0.188225 Hz  
 AQ 2.6563926 sec  
 RG 203  
 DW 40.533 usec  
 DE 20.00 usec  
 TE 298.0 K  
 D1 1.00000000 sec  
 TD0 1

----- CHANNEL f1 -----  
 SF01 600.1337060 MHz  
 NUC1 1H  
 P1 10.60 usec  
 P1M1 27.82500076 W

F2 - Processing parameters  
 SI 32768  
 SF 600.1300000 MHz  
 WDW EM  
 SSB 0  
 LB 0.30 Hz  
 GB 0  
 FC 1.00

**8-(4-Anisyl)-3-methyl-2-(4-nitrophenyl)-6-oxo-*N*<sup>4</sup>,*N*<sup>5</sup>-diphenyl-2,6-dihydrocinnoline-4,5-dicarboxamide (3k)**

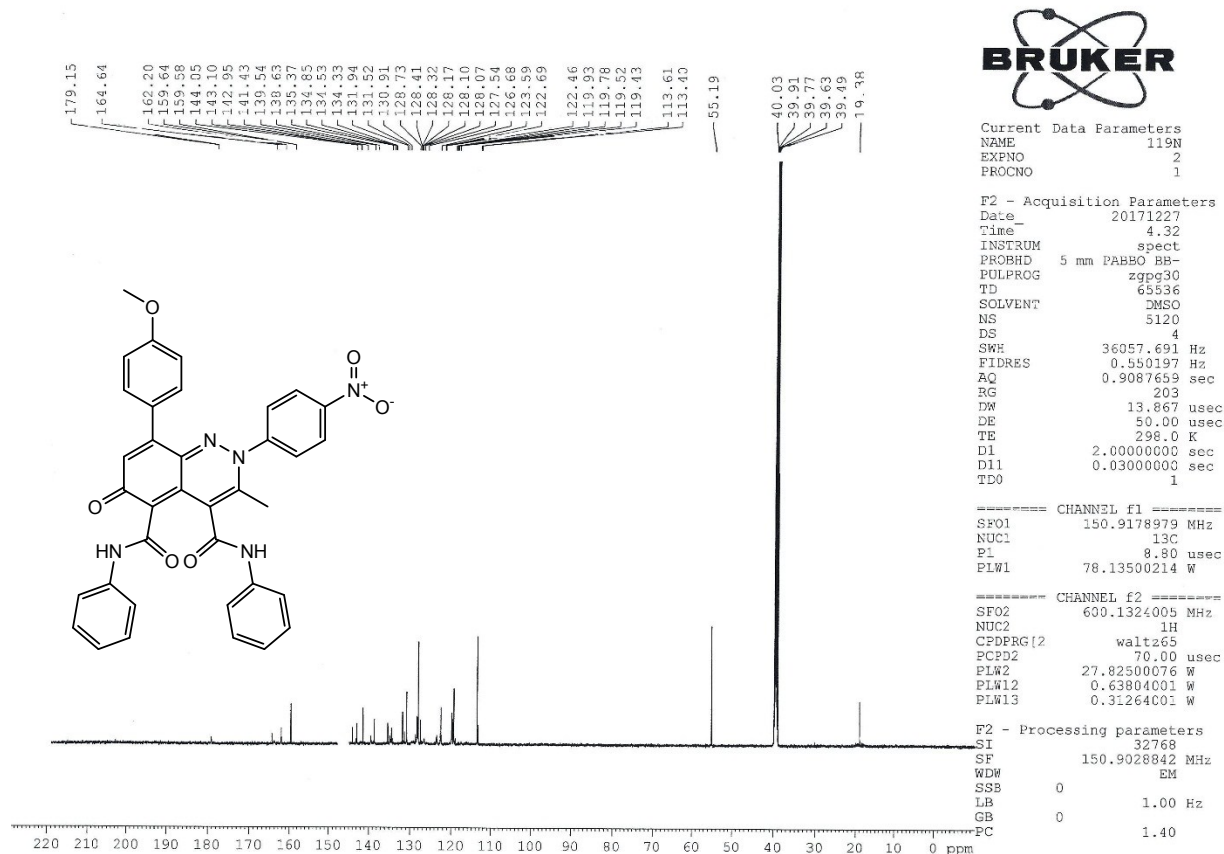

**8-(4-Anisyl)-3-methyl-2-(4-nitrophenyl)-6-oxo-*N*<sup>4</sup>,*N*<sup>5</sup>-diphenyl-2,6-dihydrocinnoline-4,5-dicarboxamide (3k)**

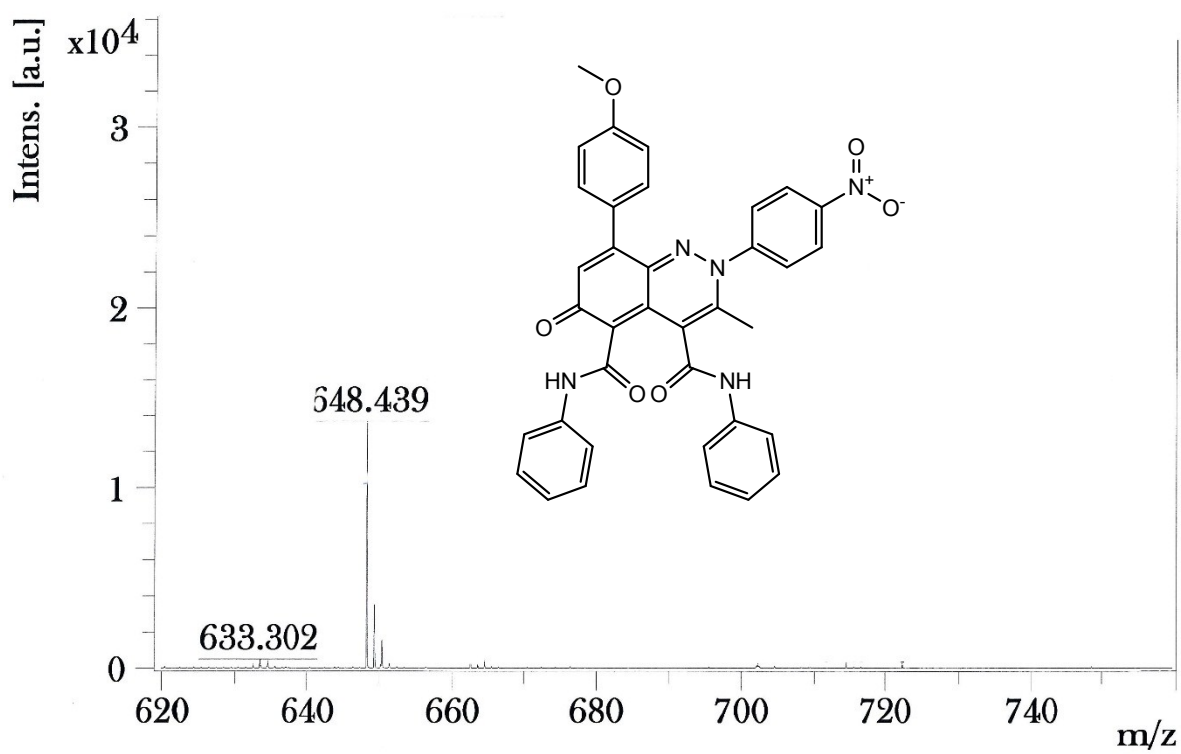

**2-(4-Chlorophenyl)-3-methyl-8-(4-nitrophenyl)-6-oxo-*N*<sup>4</sup>,*N*<sup>5</sup>-diphenyl-2,6-dihydrocinnoline-4,5-dicarboxamide (3l)**

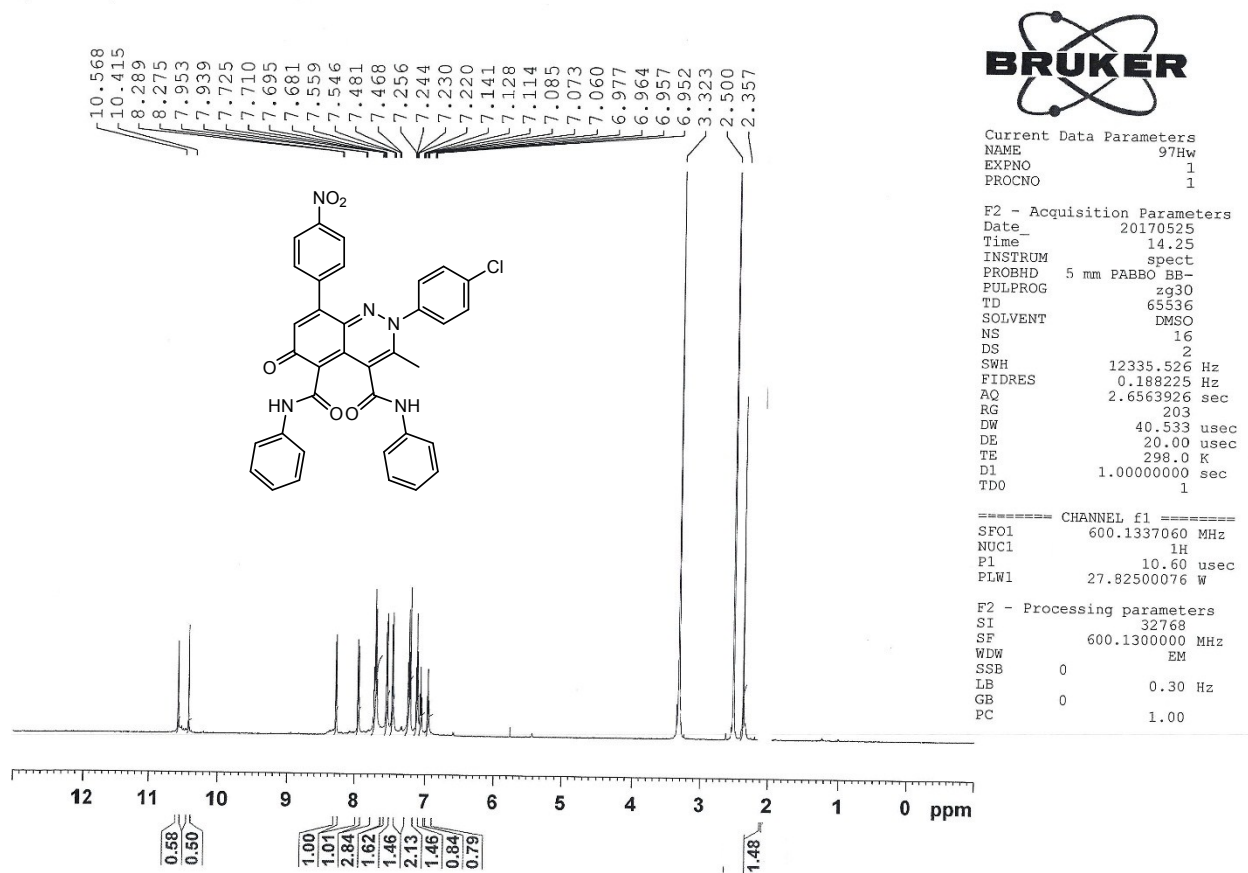

**2-(4-Chlorophenyl)-3-methyl-8-(4-nitrophenyl)-6-oxo-*N*<sup>4</sup>,*N*<sup>5</sup>-diphenyl-2,6-dihydrocinnoline-4,5-dicarboxamide (3l)**

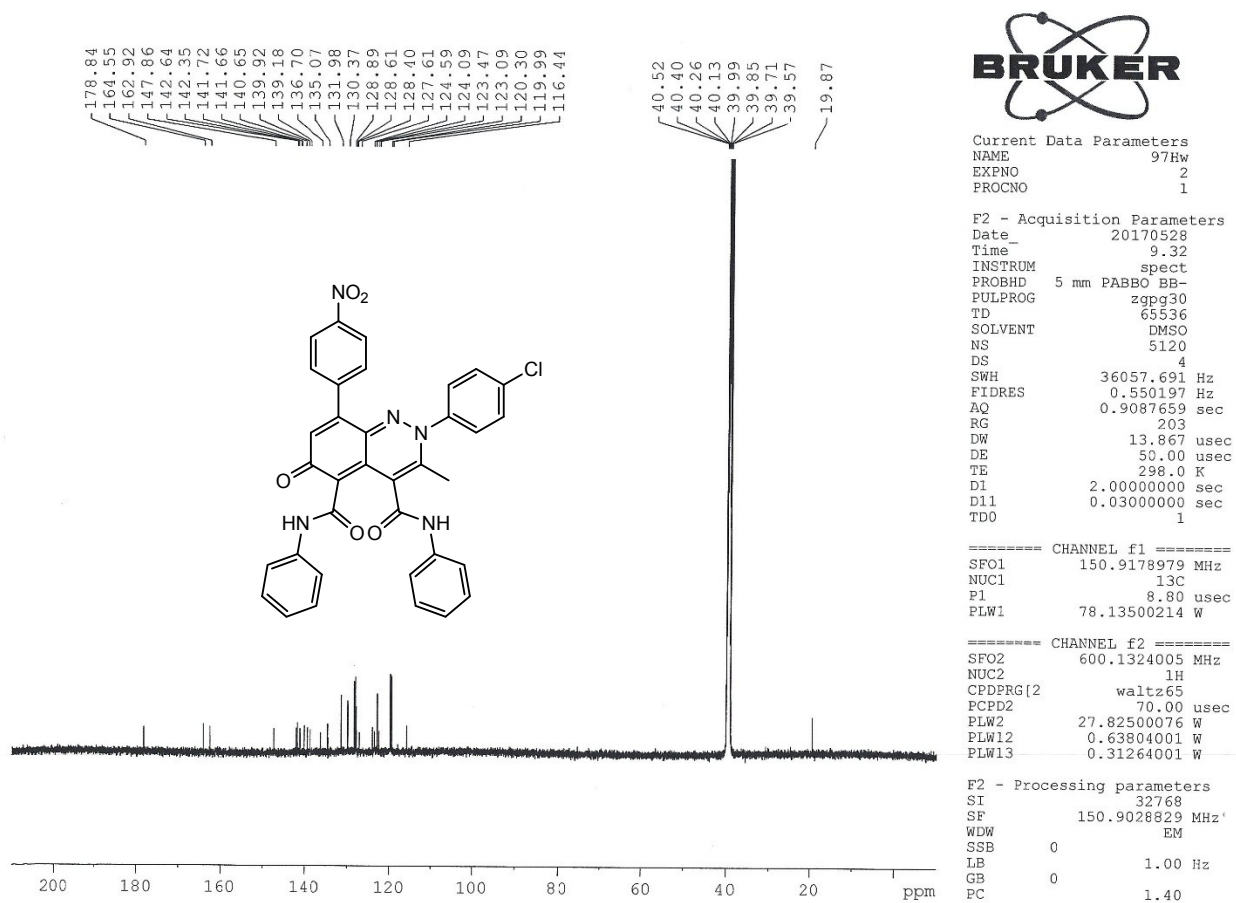



**2-(4-Bromophenyl)-3-methyl-8-(4-nitrophenyl)-6-oxo-*N*<sup>4</sup>,*N*<sup>5</sup>-diphenyl-2,6-dihydrocinnoline-4,5-dicarboxamide (3m)**

1H spectra Dr.Hamad 104HW in DMSO

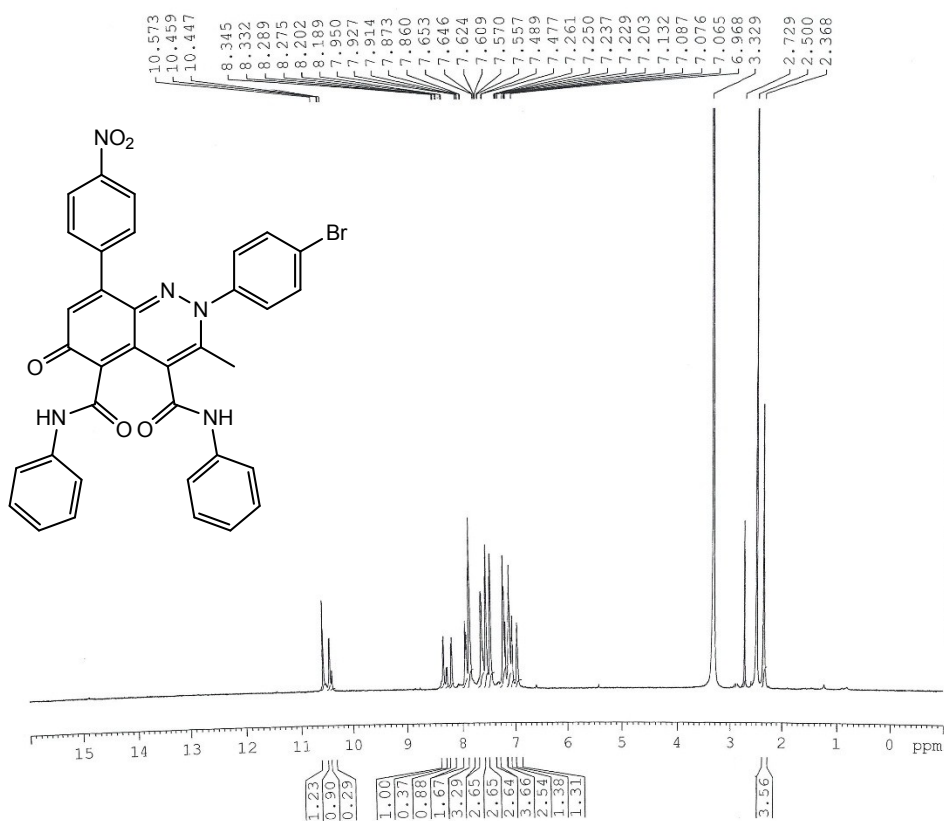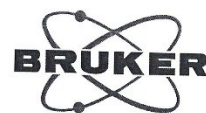

Current Data Parameters  
NAME 104HW  
EXPNO 1  
PROCNO 1

F2 - Acquisition Parameters  
Date\_ 20170621  
Time 11.57  
INSTRUM spect  
PROBHD 5 mm PABBO BB-  
PULPROG zg30  
TD 65536  
SOLVENT DMSO  
NS 16  
DS 2  
SWH 12335.526 Hz  
FIDRES 0.188225 Hz  
AQ 2.6563926 sec  
RG 203  
DW 40.533 usec  
DE 20.00 usec  
TE 298.0 K  
D1 1.00000000 sec  
TD0 1

===== CHANNEL f1 =====  
SFO1 600.1337060 MHz  
NUC1 1H  
P1 10.60 usec  
PLW1 27.82500076 W

F2 - Processing parameters  
SI 32768  
SF 600.1300000 MHz  
WDW EM  
SSB 0  
LB 0.30 Hz  
GB 0  
PC 1.00

**2-(4-Bromophenyl)-3-methyl-8-(4-nitrophenyl)-6-oxo-*N*<sup>4</sup>,*N*<sup>5</sup>-diphenyl-2,6-dihydrocinnoline-4,5-dicarboxamide (3m)**

<sup>13</sup>C decoupled spectra Dr.Hamad 104HW in DMSO

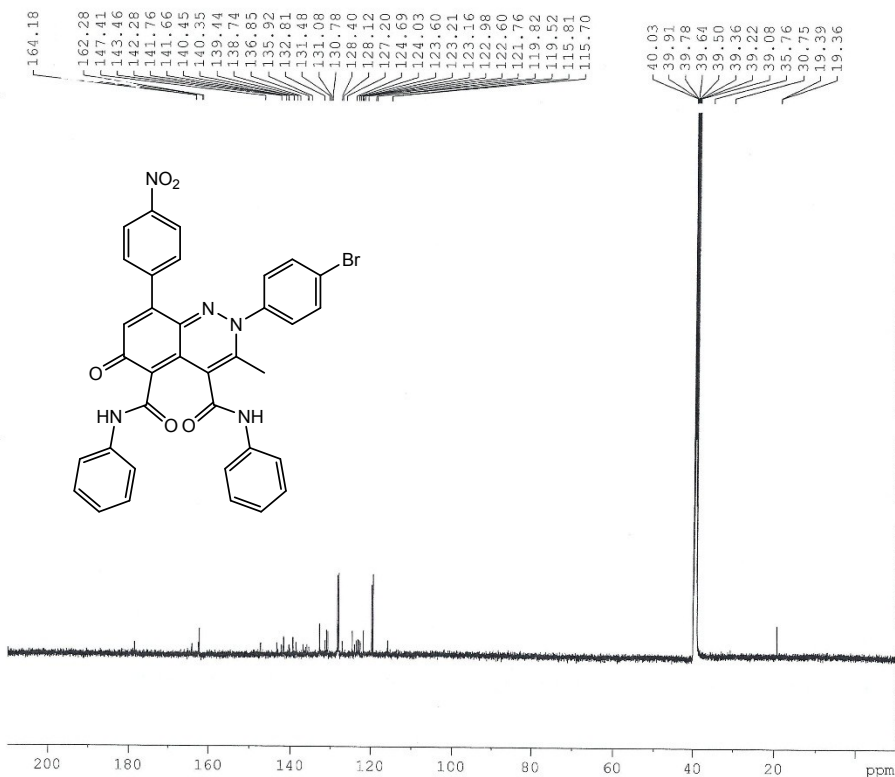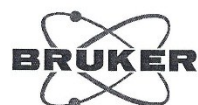

Current Data Parameters  
 NAME 104HW  
 EXPNO 2  
 PROCNO 1

F2 - Acquisition Parameters  
 Date 20170621  
 Time 23.03  
 INSTRUM spect  
 PROBHD 5 mm PABBO BB-  
 PULPROG zgpg30  
 TD 65536  
 SOLVENT DMSO  
 NS 6144  
 DS 4  
 SWH 36057.691 Hz  
 FIDRES 0.550197 Hz  
 AQ 0.9087659 sec  
 RG 203  
 DW 13.867 usec  
 DE 50.00 usec  
 TE 297.9 K  
 D1 2.0000000 sec  
 D11 0.0300000 sec  
 TDO 1

===== CHANNEL f1 =====  
 SFO1 150.9178979 MHz  
 NUC1 13C  
 PI 8.80 usec  
 PLW1 78.13500214 W

===== CHANNEL f2 =====  
 SFO2 600.1324005 MHz  
 NUC2 1H  
 CPDPRG2 waltz65  
 PCPD2 70.00 usec  
 PLW2 27.82500076 W  
 PLW12 0.63804001 W  
 PLW13 0.31264001 W

F2 - Processing parameters  
 SI 32768  
 SF 150.9028825 MHz  
 WDW EM  
 SSB 0  
 LB 1.00 Hz  
 GB 0  
 PC 1.40

**2-(4-Bromophenyl)-3-methyl-8-(4-nitrophenyl)-6-oxo-*N*<sup>4</sup>,*N*<sup>5</sup>-diphenyl-2,6-dihydrocinnoline-4,5-dicarboxamide (3m)**

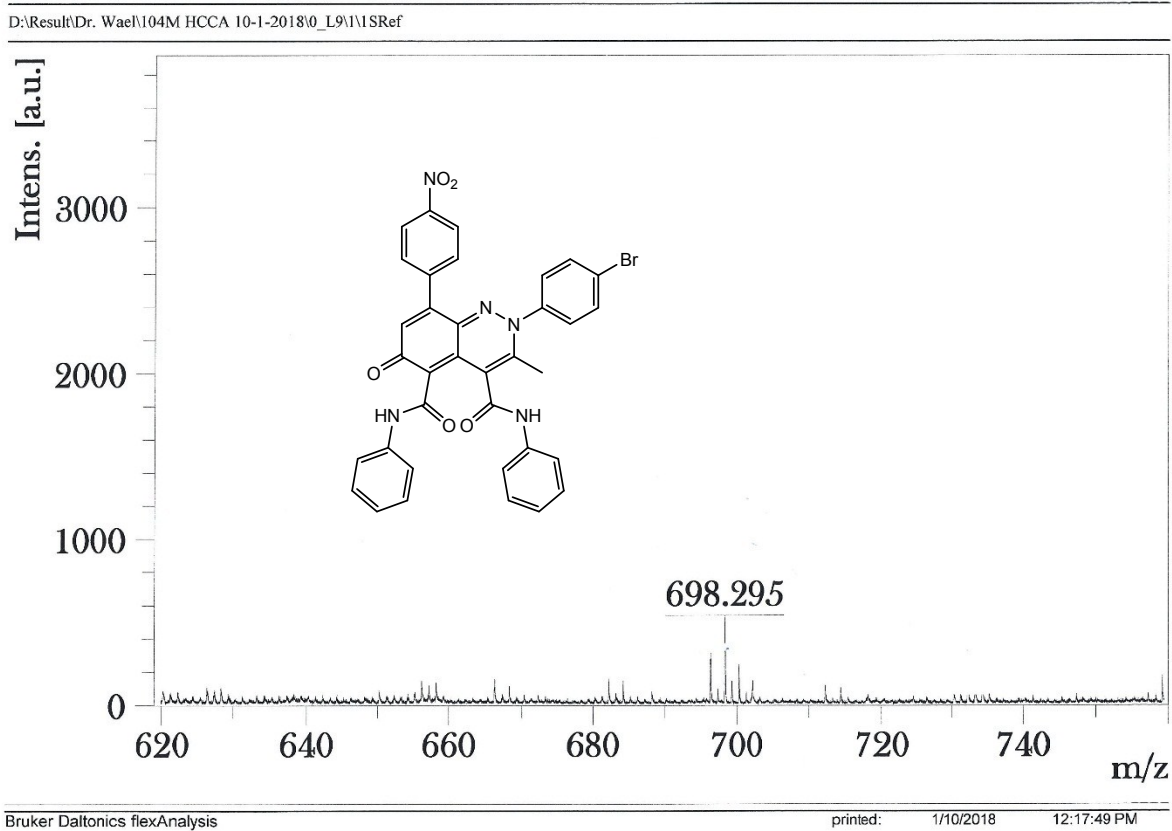

**2-(4-Bromophenyl)-3,8-dimethyl-6-oxo-*N*<sup>4</sup>,*N*<sup>5</sup>-diphenyl-2,6-dihydrocinnoline-4,5-dicarboxamide (3n)**

1H spectra Dr.Hamad 141HW in DMSO

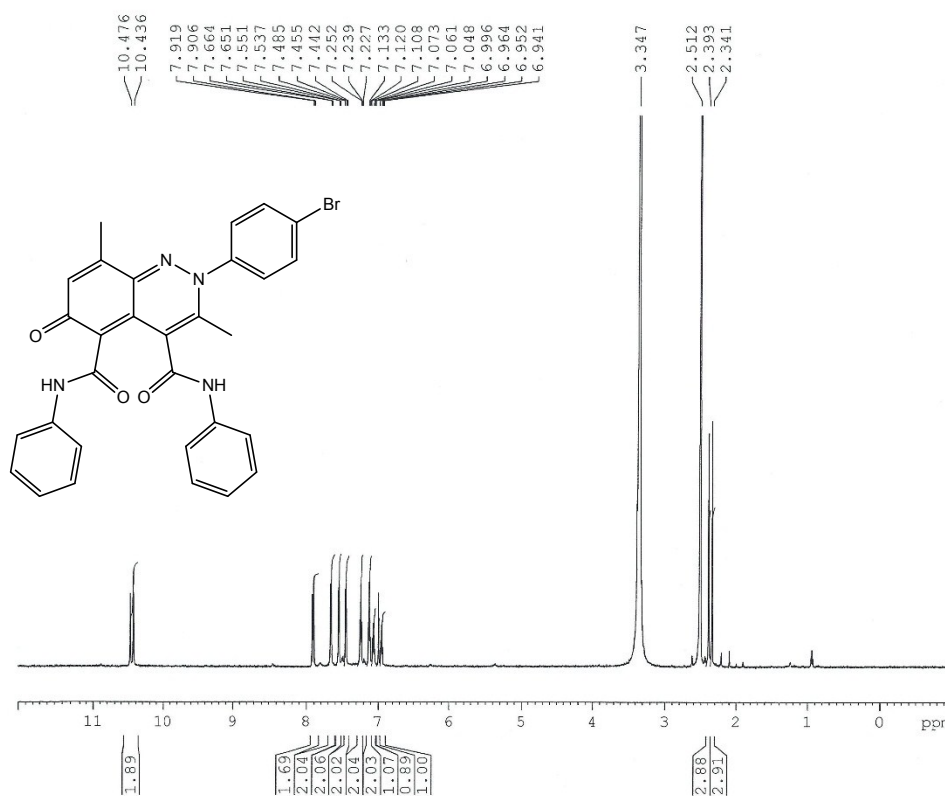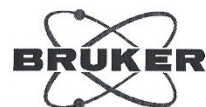

Current Data Parameters  
 NAME 141HW  
 EXPNO 1  
 PROCNO 1

F2 - Acquisition Parameters  
 Date\_ 20171108  
 Time 8.55  
 INSTRUM spect  
 PROBHD 5 mm PABBO BB-  
 PULPROG zg30  
 TD 65536  
 SOLVENT DMSO  
 NS 16  
 DS 2  
 SWH 12335.526 Hz  
 FIDRES 0.188225 Hz  
 AQ 2.6563926 sec  
 RG 203  
 DW 40.533 usec  
 DE 20.06 usec  
 TE 298.0 K  
 D1 1.00000000 sec  
 TD0 1

===== CHANNEL f1 =====  
 SF01 600.1337060 MHz  
 NUCL 1H  
 P1 10.60 usec  
 PLW1 27.82500076 W

F2 - Processing parameters  
 SI 32768  
 SF 600.1300000 MHz  
 WDW EM  
 SSB 0  
 LB 0.30 Hz  
 GB 0  
 PC 1.00

**2-(4-Bromophenyl)-3,8-dimethyl-6-oxo-*N*<sup>4</sup>,*N*<sup>5</sup>-diphenyl-2,6-dihydrocinnoline-4,5-dicarboxamide (3n)**

13C decoupled spectra Dr.Hamad 141HW in DMSO

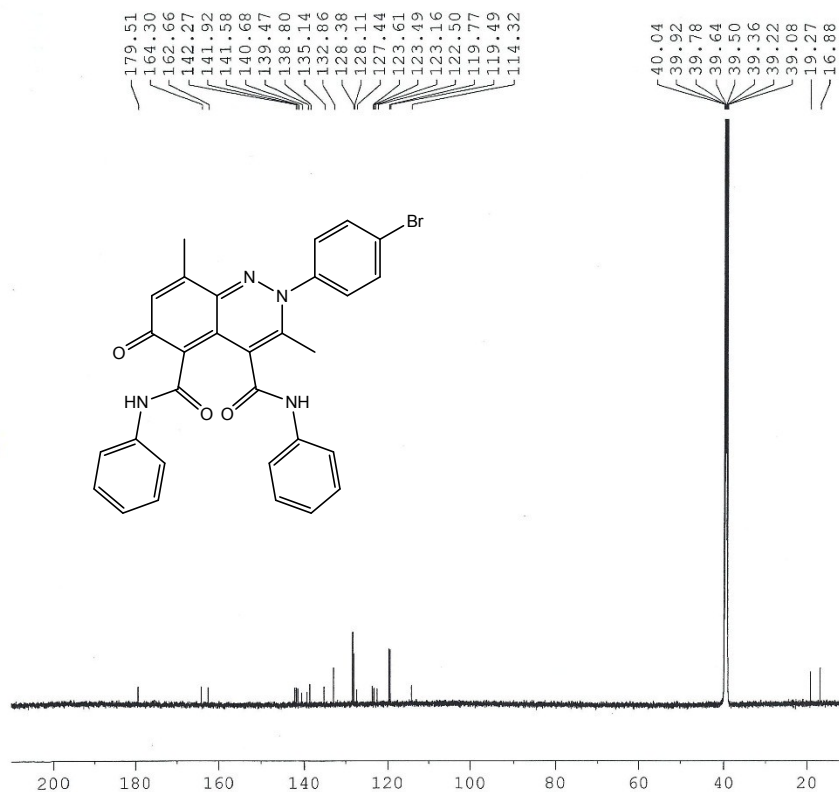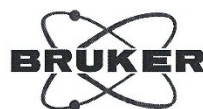

Current Data Parameters  
NAME 141HW  
EXPNO 3  
PROCNO 1

F2 - Acquisition Parameters  
Date\_ 20171111  
Time\_ 13.34  
INSTRUM spect  
PROBHD 5 mm PABBO BB-  
PULPROG zgpg30  
TD 65536  
SOLVENT DMSO  
NS 20480  
DS 4  
SWH 36057.691 Hz  
FIDRES 0.550197 Hz  
AQ 0.9087659 sec  
RG 203  
DW 13.867 usec  
DE 50.00 usec  
TE 298.0 K  
D1 2.00000000 sec  
D11 0.03000000 sec  
TD0 1

===== CHANNEL f1 =====  
SFO1 150.9178979 MHz  
NUC1 13C  
P1 8.80 usec  
PLW1 78.13500214 W

===== CHANNEL f2 =====  
SFO2 600.1324005 MHz  
NUC2 1H  
CPDPRG[2] waltz65  
PCPD2 70.00 usec  
PLW2 27.82500076 W  
PLW12 0.63804001 W  
PLW13 0.31264001 W

F2 - Processing parameters  
SI 32768  
SF 150.9028815 MHz  
WDW EM  
SSB 0  
LB 1.00 Hz  
GB 0  
PC 1.40

**2-(4-Bromophenyl)-3,8-dimethyl-6-oxo-*N*<sup>4</sup>,*N*<sup>5</sup>-diphenyl-2,6-dihydrocinnoline-4,5-dicarboxamide (3n)**

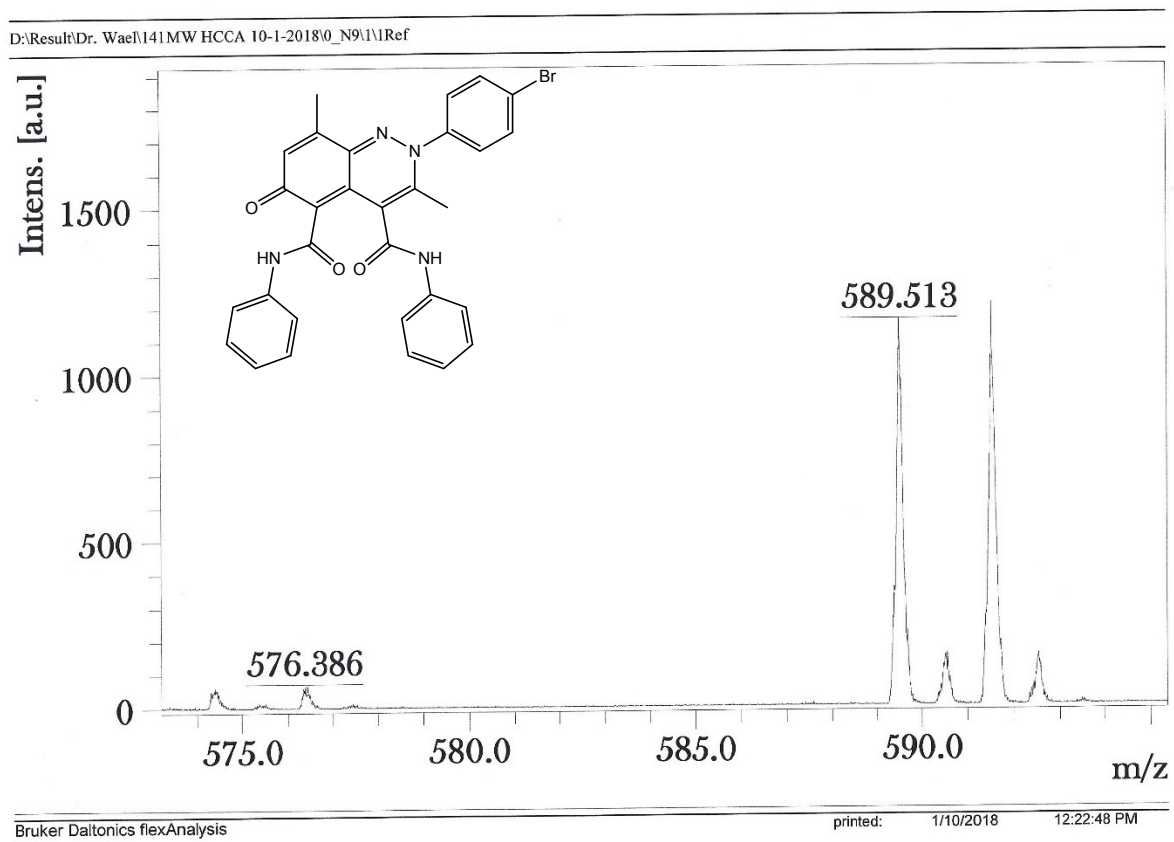

**3,8-Dimethyl-2-(2-nitrophenyl)-6-oxo-*N*<sup>4</sup>,*N*<sup>5</sup>-diphenyl-2,6-dihydrocinnoline-4,5-dicarboxamide (30)**

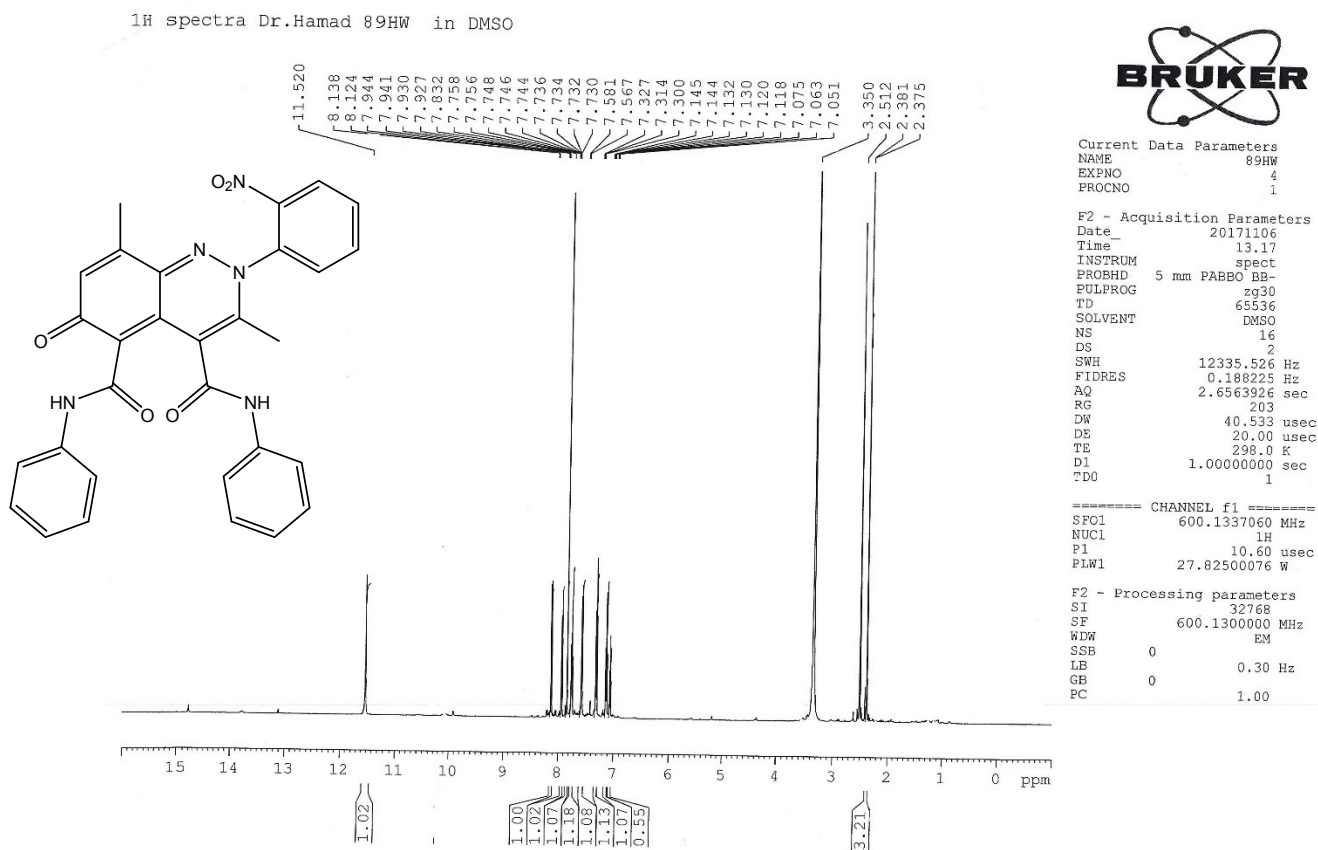

**3,8-Dimethyl-2-(2-nitrophenyl)-6-oxo-*N*<sup>4</sup>,*N*<sup>5</sup>-diphenyl-2,6-dihydrocinnoline-4,5-dicarboxamide (3o)**

13C decoupled spectra Dr.Hamad 89HW in DMSO

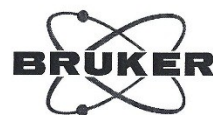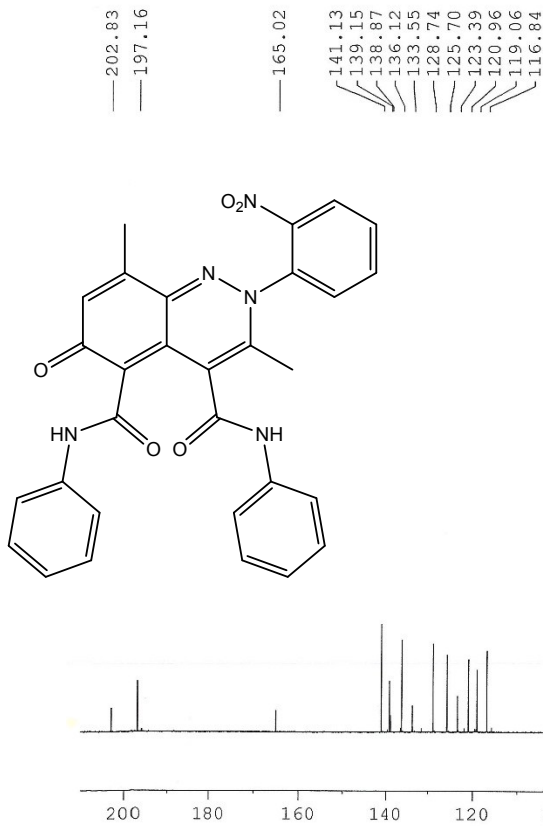

```

Current Data Parameters
NAME          89HW
EXPNO         5
PROCNO        1

F2 - Acquisition Parameters
Date_         20171108
Time          0.51
INSTRUM      spect
PROBHD       5 mm PABBO BB-
PULPROG      zgpg30
TD           65536
SOLVENT      DMSO
NS           10240
DS           4
SWH          36057.691 Hz
FIDRES       0.550197 Hz
AQ           0.9087659 sec
RG           203
DW           13.867 usec
DE           50.00 usec
TE           298.0 K
D1           2.0000000 sec
D11          0.0300000 sec
TD0          1

===== CHANNEL f1 =====
SFO1         150.9178979 MHz
NUC1          13C
PI            8.80 usec
PLW1         78.13500214 W

===== CHANNEL f2 =====
SFO2         600.1324005 MHz
NUC2          1H
CPDPRG[2]    waltz65
PCPD2        70.00 usec
PLW2         27.82500076 W
PLW12        0.63804001 W
PLW13        0.31264001 W

F2 - Processing parameters
SI            32768
SF           150.9028819 MHz
WDW           EM
SSB           0
LB            1.00 Hz
GB            0
PC            1.40
    
```
